# Supplementary material for: Paraventricular hypothalamic input to anterior cingulate cortex controls food preferences in chronic visceral pain
Source: Research Square preprint supplement (doi:10.21203/rs.3.rs-4985475/v1), 2024-09-18
Supplement: Supplementary file 1 [file 396c1f058b36ec8e19d4d24d.xlsx]

## Sheet: Figure1
Figure1b														Figure1g
Weeks	CON														CON											ANOVA summary
6w	32.4	35.6	36.8	33.6	36.4	38.8	34	34.4						Pre	22.35	23.09	21.58	20.97	19.88	21.18	24.44	19.3	21.05			F	19.02
8w	34.4	34	31.2	30.4	32.4	33.2	35.2	33.2		ANOVA summary				12h	22.88	23.98	21.55	21.77	19.92	21.55	24.88	20.58	22.75			P value	<0.0001
10w	35.6	35.2	36.8	33.2	32	34.8	36.8	31.6		F	13.76				NCI											Groups	P value
12w	36.8	32	35.6	35.2	34	36	34.4	37.6		P value	<0.0001			Pre	20.48	22.09	21.88	19.96	19.43	20.66	20.37	18.55	19.69		Pre	CON VS NCI	0.8273
	NCI									Groups	P value			12h	20.01	21.36	20.44	18.83	18.75	19.38	19.55	18.01	18.98		12h	CON VS NCI	0.0001
6w	24.4	20.8	21.6	22.8	22	22.4	25.2	22.8	6w	CON VS NCI	<0.0001
8w	26.8	24.8	24.8	23.6	24.4	27.2	26	28.8	8w	CON VS NCI	<0.0001
10w	28.8	26	26	23.6	24.8	26	30	31.6	10w	CON VS NCI	<0.0001			Figure1h
12w	29.6	27.6	35.2	27.8	32.8	32.4	32.8	31.6	12w	CON VS NCI	0.0011			Time	NCI
														0	24	23.5	25	25	22.5	24	22.5	22	22.5			ANOVA summary
Figure1e														1	25.5	25	24.5	26	20.5	22.5	23.5	23.5	24			F	87.44
	CON													2	24	24.5	24	23.5	22.5	22	23	23	22.5			P value	<0.0001
IL	63.1228	71.4142	56.8901	54.0293	61.332	77.9009	53.578	51.3982	81.2091		ANOVA summary			3	23.5	24	23.5	25	22.5	22	23.5	24.5	21.5			Groups	P value
S	25.4272	13.3315	28.9021	25.7288	24.1396	10.2318	28.6654	26.5689	12.5109		F	23.39			Ibuprofen										0h	NCI VS Ibuprofen	0.6858
W	11.45	15.2542	14.2079	20.2419	14.5284	11.8673	17.7567	22.0329	6.28003		P value	<0.0001		0	24	23	23	23.5	22.5	21.5	24	23	22.5		1h	NCI VS Ibuprofen	<0.0001
	NCI										Groups	P value		1	30.5	31.5	31	32.5	28	26.5	29	31	29.5		2h	NCI VS Ibuprofen	<0.0001
IL	27.0812	26.0486	51.3551	43.3837	26.1267	15.5031	25.2695	25.0421	16.157	IL	CON VS NCI	<0.0001		2	28.5	30	29	27.5	30	30	29.5	30	31		3h	NCI VS Ibuprofen	0.1236
S	41.9759	29.5364	18.8792	20.5104	57.9396	62.5328	52.9243	51.3182	61.3378	S	CON VS NCI	0.0002		3	26	25	26	25.5	25.5	24.5	23.5	23	21
W	30.9428	44.415	29.7657	36.1059	15.9337	21.964	21.8062	23.6397	22.5052	W	CON VS NCI	0.0519			Indomethacin										0h	NCI VS Indomethacin	0.7181
														0	23.5	23	23	23.5	22	22.5	23.5	22.5	22		1h	NCI VS Indomethacin	<0.0001
	CON													1	31	30	31	29.5	30.5	32.5	31.5	30	32		2h	NCI VS Indomethacin	<0.0001
IL	89.7818	92.1338	73.9237	80.9648	91.5441	91.3104	41.4966	95.326	86.7816		ANOVA summary			2	31.5	28	30.5	29	30.5	29	31.5	30	28		3h	NCI VS Indomethacin	0.2405
S	5.6413	0.271248	16.1132	8.3442	0.735294	1.5417	40.3061	0.184502	7.61494		F	33.68		3	25	23	25	23	26	25	23	22	20
W	4.5769	7.59494	9.9631	10.691	7.72059	7.14786	18.1973	4.48954	5.60345		P value	<0.0001
	NCI										Groups	P value		Figure1i
IL	7.79221	4.6	10.5422	45.2722	40.6824	2.16216	54.2416	20.3279	3.19149	IL	CON VS NCI	<0.0001			NCI+1h
S	90.3319	91	76.8072	39.5415	50.9186	70.2703	34.7044	61.3115	73.4043	S	CON VS NCI	<0.0001		IL	18.7752	28.1193	34.0194	18.638	27.7152	23.8323	43.0811	15.4501	32.4367
W	1.8759	4.4	12.6506	15.1862	8.39895	27.5676	11.054	18.3607	23.4043	W	CON VS NCI	0.8487		S	42.3317	39.4277	33.0276	48.8268	42.4055	50.4625	36.3047	46.4078	31.6033			ANOVA summary
														W	38.8931	32.453	32.9531	32.5352	29.8792	25.7052	20.6142	38.1421	35.96			F	1.089
															Ibuprofen+1h											P value	<0.0001
Figure1f							Figure1l							IL	42.2498	41.8671	46.4	30.4023	39.8599	35.9337	37.5524	33.2463	43.005			Groups	P value
	Food zone time (%)	Food intake percentage (%)						Food zone time (%)	Food intake percentage (%)					S	29.4	27.5086	30.0133	22.5185	28.798	43.3333	49.6043	21.9204	26.3251		IL	NCI+1h VS Ibuprofen+1h	0.0052
	63.1228	95.0958		Correlation/Linear reg.				29.2404	91.3928		Correlation/Linear reg.			W	28.3502	30.6243	23.5867	47.0792	31.342	20.733	12.8432	44.8333	30.6698			NCI+1h VS Indomethacin+1h	0.0087
	71.4142	92.1338		F	39.19			44.3729	93.7269		F	14.48			Indomethacin+1h										S	NCI+1h VS Ibuprofen+1h	0.0203
	56.8901	73.9237		r	0.7318			66.7666	84.8958		r	0.5706		IL	30.2668	38.1491	43.1128	29.2028	40.4103	45.9052	41.6162	40.4832	35.0933			NCI+1h VS Indomethacin+1h	0.0053
	54.0293	80.9648		P value	<0.0001			63.044	95.3765		P value	0.0006		S	22.3215	17.2063	38.2101	38.0799	23.2001	23.6839	26.2407	27.0891	46.5007		W	NCI+1h VS Ibuprofen+1h	0.8415
	61.332	91.5441		R squared	0.5355			28.4177	74.7331		R squared	0.3256		W	47.4117	44.6445	18.677	32.7173	36.3896	30.411	32.1431	32.4277	18.406			NCI+1h VS Indomethacin+1h	0.9779
	77.9009	91.3104						26.4447	41.8605
	53.578	41.4966						46.4838	92.7171						NCI+1h
	51.3982	95.326						39.8968	97.2868					IL	41.0256	25.1534	25.7143	7.14286	24.3243	21.7391	27.2727	41.9355	27.7778
	81.2091	86.7816						23.4131	4.53834					S	50	69.9386	65.7143	83.3333	64.8649	65.2174	47.7273	38.7097	58.3333			ANOVA summary
	25.4272	5.6413						35.5949	4.30504					W	8.97436	4.90798	8.57143	9.52381	10.8108	13.0435	25	19.3548	13.8889			F	38.28
	13.3315	0.271248						14.313	12.3264						Ibuprofen+1h											P value	<0.0001
	28.9021	16.1132						11.9845	1.321					IL	70.5263	21.6216	77.6961	80	84.9462	55.5556	50	57.6923	71.4286			Groups	P value
	25.7288	8.3442						23.2595	20.9964					S	8.42105	54.054	18.6274	15.5556	7.52688	38.8889	27.2727	38.4615	9.52381		IL	NCI+1h VS Ibuprofen+1h	<0.0001
	24.1396	0.735294						42.5879	30.2326					W	21.0526	24.3243	3.67647	4.44444	7.52688	5.55556	22.7273	3.84615	19.0476			NCI+1h VS Indomethacin+1h	0.0044
	10.2318	1.5417						23.1388	5.88235						Indomethacin+1h										S	NCI+1h VS Ibuprofen+1h	<0.0001
	28.6654	40.3061						28.8405	1.67959					IL	45.7143	23.6842	34.3284	30.4348	77.3585	53.6232	56.1905	49.3984	57.6395			NCI+1h VS Indomethacin+1h	<0.0001
	26.5689	0.184502						2.8095	15.4281					S	25.7143	23.6842	38.806	62.3188	20.7547	30.4348	34.2857	28.4893	24.3908		W	NCI+1h VS Ibuprofen+1h	0.9993
	12.5109	7.61494						35.9846	36.1977					W	28.5714	52.6316	26.8657	7.24638	1.88679	15.942	9.52381	12.3792	8.93474			NCI+1h VS Indomethacin+1h	0.6069
	27.0812	7.79221						34.0539	2.20994
	26.0486	4.6						38.4043	50
	51.3551	10.5422						29.727	36.4898					Figure1j
	43.3837	45.2722						20.7959	23.9482					Weeks	CON
	26.1267	40.6824						39.5557	33.1502					6w	32	36	36	33.3333	36.6667	34.6667	34.6667	32.6667
	15.5031	2.16216						24.2665	33.6709					8w	32.6667	34	30.6667	30	30.6667	31.3333	32	33.3333		ANOVA summary
	25.2695	54.2416						86.6957	82.5929					10w	32	32.6667	32.6667	34.6667	30	31.3333	34.6667	30.6667		F	6.256
	25.0421	20.3279						31.8157	61.0646					12w	34	32	36	36	28	29.3333	33.3333	33.3333		P value	0.001
	16.157	3.19149						19.9174	83.9779						NMD									Groups	P value
	41.9759	90.3319						36.2138	24.359					6w	23.3333	23.3333	24	26	24.6667	24	24.6667	27.3333	6w	CON VS NMD	<0.0001
	29.5364	91						33.4681	62.3203					8w	28.6667	24	26.6667	23.3333	24.6667	25.3333	26	25.3333	8w	CON VS NMD	<0.0001
	18.8792	76.8072						42.1742	60.8414					10w	28.6667	27.3333	26.6667	24.6667	26	26.6667	28.6667	29.3333	10w	CON VS NMD	<0.0001
	20.5104	39.5415						26.7064	60.8059					12w	29.3333	28	29.3333	28	32.6667	31.3333	30.6667	30.6667	12w	CON VS NMD	0.0137
	57.9396	50.9186						47.4187	65.8228
	62.5328	70.2703						62.5328	70.2703					Figure1k
	52.9243	34.7044						52.9243	34.7044						CON
	51.3182	61.3115						51.3182	61.3115					IL	91.3928	93.7269	84.8958	74.7331	92.7171	97.2868	54.0373	80.6696			ANOVA summary
	61.3378	73.4043						61.3378	73.4043					S	4.53834	4.30504	12.3264	20.9964	5.88235	1.67959	26.087	11.9299			F	146
														W	4.06886	1.96802	2.77778	4.27046	1.40056	1.03359	19.8758	7.4005			P value	<0.0001
															NMD										Groups	P value
														IL	15.4281	36.1977	36.4898	23.9482	33.1502	33.6709	26.0784	28.5748		IL	CON VS NMD	<0.0001
														S	82.5929	61.0646	62.3203	60.8414	60.8059	65.8228	69.0196	63.4227		S	CON VS NMD	<0.0001
														W	1.979	2.73764	1.18989	15.2104	6.04396	0.506329	4.90196	8.00248		W	CON VS NMD	0.9999
															CON
														IL	29.2404	44.3729	66.7666	63.044	28.4177	26.4447	46.4838	39.8968			ANOVA summary
														S	23.4131	35.5949	14.313	11.9845	23.2595	42.5879	23.1388	28.8405			F	10.77
														W	47.3465	20.0322	18.9204	24.9715	48.3228	30.9673	30.3774	31.2626			P value	0.0002
															NMD										Groups	P value
														IL	26.9034	35.9846	34.0539	38.4043	29.727	20.7959	39.5557	24.2665		IL	CON VS NMD	0.0027
														S	58.3035	31.8157	19.9174	36.2138	33.4681	42.1742	26.7064	47.4187		S	CON VS NMD	0.0006
														W	14.7931	32.1997	46.0287	25.3818	36.8049	37.0298	33.738	28.3148		W	CON VS NMD	0.9805

## Sheet: Figure2
Figure2a						Figure2g
	CON	NCI					CON
	8	84				120pA	10	8	10	10	8	8	11	10	9			ANOVA summary
	18	72	UnPaired t-test			160pA	11	10	13	11	9	9	11	11	10			F	3.604
	12	54	P value	<0.0001		200pA	13	11	12	12	10	11	13	11	11			P value	0.0348
	10	62	t	12.22			NCI											Groups	P value
	14	78	df	5		120pA	21	10	13	11	12	12	12	12	16		120pA	CON VS NCI	0.0174
	14	76				160pA	23	11	17	13	17	12	13	12	15		160pA	CON VS NCI	0.0088
						200pA	23	12	21	15	21	13	13	11	16		200pA	CON VS NCI	0.0043
Figure2b
	CCK++c-Fos+/c-Fos+
	96.3855					Figure2j												ANOVA summary
	97.9381					CON	35.5	32.5	36	31	31.5	33	33	30	35			F	56.18
	97.7778					hM3Dq+NS	34.5	32.5	35.5	28.5	32.5	32.5	35	30.5	35			P value	<0.0001
	97.4684					hM3Dq+CNO	24.5	23.5	25.5	24	25	25	24.5	26	26			Groups	P value
	97.8261																	CON VS hM3Dq+NS	0.9885
	97.9167																	CON VS hM3Dq+CNO	<0.0001
	97.7528
						Figure2k	hM3Dq+NS
Figure2e						IL	98.7031	94.477	94.6371	96.353	94.6342	94.3994	96.7477	94.7549	99.2754			ANOVA summary
	CON	NCI				S	0.175254	4.64321	3.28248	0.720396	3.95122	3.63075	1.83969	0.343137	0.202899			F	44.55
	-6.54423	58.4836	UnPaired t-test			W	1.12163	6.87976	2.08044	2.92661	1.41463	1.96987	4.41261	4.90196	0.521739			P value	<0.0001
	16.9882	47.3579	P value	0.0022			hM3Dq+CNO											Groups	P value
	-15.5806	28.0158	t	3.872		IL	34.1219	6.28931	3.67454	0.479846	18.7423	26.8199	2.46548	0.970874	22.274		IL	hM3Dq+NS VS hM3Dq+CNO	<0.0001
	2.181	34.3195	df	12		S	63.7853	74.2138	76.8373	91.8426	75.709	7.66284	94.6746	78.3171	1.89504		S	hM3Dq+NS VS hM3Dq+CNO	<0.0001
	20.413	37.4613				W	2.09281	19.4969	19.4882	7.67754	5.5487	5.51724	2.85996	20.712	5.8309		W	hM3Dq+NS VS hM3Dq+CNO	0.7073
	-18.6363	43.6778					hM3Dq+NS
	45.316	52.7225				IL	43.9571	52.0145	48.2233	51.5342	29.5949	35.457	37.9959	44.3364	35.9425			ANOVA summary
						S	28.5362	29.7461	20.2942	14.2484	32.7942	35.8407	23.1029	27.6815	29.4286			F	2.077
						W	27.5067	18.2394	31.4826	34.2174	37.6108	28.7023	38.9012	27.982	34.6289			P value	0.1364
							hM3Dq+CNO											Groups	P value
						IL	34.1713	33.9007	21.3797	34.4459	23.2613	31.5873	29.6106	24.7395	39.9435		IL	hM3Dq+NS VS hM3Dq+CNO	0.0049
						S	30.3434	43.8142	23.4717	39.8057	37.7198	40.341	42.4788	45.7	36.4083		S	hM3Dq+NS VS hM3Dq+CNO	0.0097
						W	35.4853	22.2851	55.1486	25.7484	39.0189	28.0717	27.9106	29.5605	23.6482		W	hM3Dq+NS VS hM3Dq+CNO	0.9933
Figure2l						Figure2o							Figure2m												ANOVA summary
	Food zone time (%)	Food intake percentage (%)					Food zone time (%)	Food intake percentage (%)					CON	23	24	22.5	23	24	24.5	24.5	22.5	35			F	76.67
	43.9571	98.7031		Correlation/Linear reg.			25.4645	28.839		Correlation/Linear reg.			hM4Di+NS	24.5	24.5	24	20.5	23.5	24.5	24	23.5	35			P value	<0.0001
	52.0145	94.477		F	27.52		23.2267	19.8091		F	10.85		hM4Di+CNO	32	31	35.5	28.5	32.5	32.5	35	30.5	26			Groups	P value
	48.2233	94.6371		r	0.6688		15.7298	8.33333		r	0.5153														CON VS hM4Di+NS	0.9824
	51.5342	96.353		P value	<0.0001		38.0103	7.35931		P value	0.0025														CON VS hM4Di+CNO	<0.0001
	29.5949	94.6341		R squared	0.4473		27.9622	11.1111		R squared	0.2655
	35.457	94.3994					42.4638	4.19355					Figure2n	hM4Di+NS
	37.9959	96.7477					36.6259	34.321					IL	28.839	19.8091	8.33333	7.35931	11.1111	4.19355	34.321	40.4612				ANOVA summary
	44.3364	94.7549					28.2529	40.4612					S	66.4794	69.6897	75.8772	86.1472	82.4289	79.6774	57.5309	49.2662				F	91.67
	35.9425	99.2754					40.4103	96.6624					W	4.68165	10.5012	15.7895	6.49351	6.45995	16.129	8.14815	10.2725				P value	<0.0001
	34.1713	34.1219					45.9052	97.8853						hM4Di+CNO											Groups	P value
	33.9007	6.28931					41.3879	97.8955					IL	96.6624	97.8853	97.8955	96.2878	95.4751	83.2079	61.1321	98.2989			IL	hM4Di+NS VS hM4Di+CNO	<0.0001
	21.3797	3.67454					40.4832	96.2878					S	2.78834	1.14695	1.65351	3.07058	1.60428	14.0706	30.9434	1.01149			S	hM4Di+NS VS hM4Di+CNO	<0.0001
	34.4459	0.479846					35.0933	95.4751					W	0.549218	0.967742	0.450958	0.641613	2.92061	2.72148	7.92453	0.689655			W	hM4Di+NS VS hM4Di+CNO	0.3823
	23.2613	18.7423					35.9612	83.2079						hM4Di+NS
	31.5873	26.8199					60.9531	61.1321					IL	25.4645	23.2267	15.7298	41.8814	27.9622	42.4638	36.6259	28.2529	29.5382			ANOVA summary
	29.6106	2.46548					52.767	98.2989					S	32.385	40.2517	45.9794	29.2294	39.2085	30.428	32.077	39.5145	44.0965			F	2.982
	24.7395	0.970874					32.385	66.4794					W	42.1505	36.5216	38.2908	36.0967	32.8293	27.1082	31.2972	32.2325	26.3653			P value	0.0602
	39.9435	39.7611					40.2517	69.6897						hM4Di+CNO											Groups	P value
	28.5362	0.175254					45.9794	75.8772					IL	40.4103	45.9052	41.3879	40.4832	35.0933	35.9612	59.9838	51.1096	42.7114		IL	hM4Di+NS VS hM4Di+CNO	0.0013
	29.7461	4.64321					29.2294	86.1472					S	36.3896	30.411	32.5155	32.4277	18.406	39.7248	19.988	18.3111	19.3673		S	hM4Di+NS VS hM4Di+CNO	0.032
	20.2942	3.28248					39.2085	82.4289					W	23.2001	23.6839	26.0967	27.0891	46.5007	24.314	18.7558	28.0134	37.9213		W	hM4Di+NS VS hM4Di+CNO	0.3842
	14.2484	0.720396					30.428	79.6774
	32.7942	3.95122					32.077	57.5309
	35.8407	3.63075					39.5145	49.2662
	23.1029	1.83968					36.3896	2.78834
	27.6815	0.343137					30.411	1.14695
	29.4286	0.202899					32.5155	1.65351
	30.3434	63.7853					32.4277	3.07058
	43.8142	74.2138					18.406	1.60428
	23.4717	76.8373					39.7248	14.0706
	39.8057	91.8426					19.988	30.9434
	37.7198	75.709					18.3111	1.01149
	40.341	7.66284
	42.4788	94.6746
	45.7	78.3172
	36.4083	53.413

## Sheet: Figure3
Figure3g						Figure3j
	CRD+NS	CRD+CNO					CRD+NS	CRD+CNO
	115.193	37.957	UnPaired t-test				-0.460692	82.7108	UnPaired t-test
	60.6911	14.108	P value	0.0337			3.7854	37.0442	P value	0.0413
	91.2326	39.7118	t	2.425			1.75507	58.825	t	2.311
	63.2653	31.2351	df	11			0.536878	3.73725	df	11
	18.5748	5.9303					0.689816	14.5723
	66.9033	14.296					-0.983267	12.2773
	16.5358							1.93392

## Sheet: Figure4
Figure4a						Figure4g
	CON	NCI					CON									ANOVA summary
	18	64				120pA	7	6	6	4	7	8	6			F	6.462
	16	74	UnPaired t-test			160pA	9	7	6	6	9	9	6			P value	0.0179
	24	56	P value	<0.0001			NCI									Groups	P value
	18	42	t	7.489		120pA	7	6	6	4	7	8	6		120pA	CON VS NCI	0.0006
	16	40	df	11		160pA	9	7	6	6	9	9	6		160pA	CON VS NCI	<0.0001
	18	56
	14
Figure4b						Figure4j											ANOVA summary
	Glu++c-Fos+/c-Fos+					CON	32	34	34	36	33.3333	30.6667	30.6667	32.6667	28.6667		F	60.52
	85.7143					hM3Dq+NS	32.6667	34.6667	33.3333	35.3333	34	30	33.3333	30	32.6667		P value	<0.0001
	93.2432					hM3Dq+CNO	24.6667	24	25.3333	25.3333	25.3333	24.6667	25.3333	26	24.6667		Groups	P value
	92.4731																CON VS hM3Dq+NS	0.8037
	90.7895																CON VS hM3Dq+CNO	<0.0001
						Figure4k	hM3Dq+NS
						IL	97.2477	48.7896	86.0262	94.1696	90.7665	87.7642	81.7427	93.4315	89.5742			ANOVA summary
						S	1.31062	26.257	10.1528	4.15194	7.49129	11.1235	16.7358	5.09626	8.07636			F	86.56
Figure4e						W	1.44168	24.9535	3.82096	1.67844	1.74216	1.11235	1.52144	1.47225	2.34949			P value	P<0.0001
	CON	NCI					hM3Dq+CNO											Groups	P value
	29.3161	51.0651	UnPaired t-test			IL	11.0816	8.04598	6.90104	40.0876	8.24742	29.1066	35.6557	23.545	29.7546		IL	hM3Dq+NS VS hM3Dq+CNO	<0.0001
	24.9056	26.028	P value	0.0435		S	75.3546	66.3793	88.0208	54.1073	86.3918	67.7233	55.6011	60.3175	64.1104		S	hM3Dq+NS VS hM3Dq+CNO	<0.0001
	22.3735	21.517	t	2.256		W	13.5638	25.5747	5.07812	5.80504	5.36082	3.17003	8.74317	16.1376	6.13497		W	hM3Dq+NS VS hM3Dq+CNO	0.636
	15.3718	42.218	df	12			hM3Dq+NS
	-7.16425	21.517				IL	38.5258	43.0662	33.8805	45.211	50.8738	43.7303	35.7475	38.5134	40.066			ANOVA summary
	35.7252	43.1241				S	32.2656	25.6752	24.7143	26.461	16.6214	19.696	29.3921	18.4771	29.4401			F	2.854
	6.35907	33.1644				W	29.2087	31.2586	41.4052	28.3279	32.5049	36.5738	34.8604	43.0095	30.494			P value	0.0674
							hM3Dq+CNO											Groups	P value
						IL	23.6627	42.2885	26.3649	21.4793	32.5229	41.1285	32.654	33.697	24.4573		IL	hM3Dq+NS VS hM3Dq+CNO	0.0173
						S	37.1496	22.514	35.4972	47.9427	29.232	20.0245	28.327	50.2088	48.7327		S	hM3Dq+NS VS hM3Dq+CNO	0.0107
						W	39.1878	35.1975	38.1379	30.578	38.2451	38.8471	39.0191	16.0942	26.81		W	hM3Dq+NS VS hM3Dq+CNO	0.9974
Figure4l						Figure4o							Figure4m												ANOVA summary
	Food zone time (%)	Food intake percentage (%)					Food zone time (%)	Food intake percentage (%)					NCI	22.6667	22.6667	23.3333	22.6667	23.3333	24.6667	22.6667	26.6667	26			F	17
	38.5258	97.2477		Correlation/Linear reg.			37.7764	6.09212		Correlation/Linear reg.			hM4Di+NS	24	23.3333	23.3333	26	18.6667	24	18.6667	21.3333	24			P value	<0.0001
	43.0662	48.7896		F	12.97		31.0112	8.09899		F	20.3		hM4Di+CNO	30	29.3333	33.3333	28.6667	26.6667	27.3333	26.6667	26	26.6667			Groups	P value
	33.8805	86.0262		r	0.5254		24.4143	11.1801		r	0.6115														CON VS hM4Di+NS	0.3789
	45.211	94.1696		P value	0.001		25.8519	9.18367		P value	<0.0001														CON VS hM4Di+CNO	0.0005
	50.8738	90.7666		R squared	0.2761		34.482	42.0833		R squared	0.3739
	43.7303	87.7642					16.4531	17.3295					Figure4n	hM4Di+NS
	35.7475	81.7427					29.4111	29.9835					IL	6.09212	8.09899	11.1801	9.18367	42.0833	17.3295	29.9835	38.6861	45.5914			ANOVA summary
	38.5134	93.4315					17.0489	38.6861					S	90.6389	88.5264	54.0373	85.102	31.25	66.7614	65.7331	56.9343	50.7527			F	43.45
	40.066	89.5742					25.7769	45.5914					W	3.26895	3.37458	34.7826	5.71429	26.6667	15.9091	4.28336	4.37956	3.65591			P value	<0.0001
	23.6627	11.0816					36.7269	93.0841						hM4Di+CNO											Groups	P value
	42.2885	8.04598					34.6919	39.6753					IL	93.0841	39.6753	71.6139	79.0982	75.9952	82.7653	69.4352	85.3051	66.343		IL	hM4Di+NS VS hM4Di+CNO	<0.0001
	26.3649	6.90104					48.3638	71.6139					S	2.52336	33.1169	22.7899	18.6091	23.5223	16.8087	26.6888	12.9514	32.6861		S	hM4Di+NS VS hM4Di+CNO	<0.0001
	21.4793	40.0876					27.4147	79.0982					W	4.39252	27.2078	5.59611	2.2927	0.482509	0.426026	3.87597	1.74346	0.970874		W	hM4Di+NS VS hM4Di+CNO	0.7389
	32.5229	8.24742					38.1366	75.9952						hM4Di+NS
	41.1285	29.1066					47.9342	82.7653					IL	37.7764	31.0112	24.4143	25.8519	34.482	16.4531	29.4111	17.0489	25.7769			ANOVA summary
	32.654	35.6557					32.5214	69.4352					S	37.2335	46.2285	30.4907	51.3665	29.6241	51.9904	26.0528	42.9105	41.7929			F	0.3956
	33.697	23.545					45.0996	85.3051					W	24.9901	22.7604	45.095	22.7816	35.8939	31.5565	44.5361	40.0407	32.4302			P value	0.6755
	24.4573	29.7546					31.4616	66.343						hM4Di+CNO											Groups	P value
	32.2656	1.31062					37.2335	90.6389					IL	36.7269	34.6919	48.3638	27.4147	38.1366	47.9342	32.5214	45.0996	31.4616		IL	hM4Di+NS VS hM4Di+CNO	0.0172
	25.6752	26.257					46.2285	88.5264					S	23.987	34.6054	28.7746	22.2628	35.6396	27.3669	27.9495	24.3074	42.3443		S	hM4Di+NS VS hM4Di+CNO	0.0356
	24.7143	10.1528					30.4907	54.0373					W	39.2861	30.7027	22.8616	50.3224	26.2238	24.699	39.5291	30.593	26.1941		W	hM4Di+NS VS hM4Di+CNO	0.9895
	26.461	4.15194					51.3665	85.102
	16.6214	7.49129					29.6241	31.25
	19.696	11.1235					51.9904	66.7614
	29.3921	16.7358					26.0528	65.7331
	18.4771	5.09626					42.9105	56.9343
	29.4401	8.07636					41.7929	50.7527
	37.1496	75.3546					23.987	2.52336
	22.514	66.3793					34.6054	33.1169
	35.4972	88.0208					28.7746	22.7899
	47.9427	54.1073					22.2628	18.6091
	29.232	86.3918					35.6396	23.5223
	20.0245	67.7233					27.3669	16.8087
	28.327	55.6011					27.9495	26.6888
	50.2088	60.3175					24.3074	12.9514
	48.7327	64.1104					42.3443	32.6861

## Sheet: Figure5
Figure5b																						ANOVA summary
	hM3Dq					hM4Di																F	33.03
	Pre	Post				Pre	Post				Figure5e											P value	<0.0001
	-5.4875	-9.25273	Paired t-test			-7.98642	-3.9731	Paired t-test			CON	33.5	32	34	32.5	28.5	29.5	30.5	28.5	29		Groups	P value
	-8.84329	-8.49709	P value	0.0349		-5.83903	-4.35098	P value	0.0255		hM3Dq+NS	32	28	32	27.5	29	29	31.5	30.5	32.5		CON VS hM3Dq+NS	0.6377
	-7.95134	-12.1023	t	2.715		-6.72434	-6.67783	t	2.954		hM3Dq+CNO	24.5	24.5	25	23	24	26.5	25.5	25	25		CON VS hM3Dq+CNO	<0.0001
	-5.1834	-9.87266	df	6		-12.2037	-3.90621	df	6
	-7.75726	-8.51402				-5.94073	-5.75387
	-8.05533	-7.66563				-9.50019	-5.06564				Figure5f	hM3Dq+NS
	-4.17381	-10.0274				-9.7203	-5.2492				IL	96.4912	98.6493	94.3154	97.9138	95.3103	98.5999	98.7706	98.3339	60.3175			ANOVA summary
											S	2.77778	0.186306	4.64548	0.208623	3.41071	0.975817	0.351247	0.5795	8.99471			F	81.27
	Peak Amplitude (pA)	Pre-CNO	Post-CNO			Peak Amplitude (pA)	Pre-CNO	Post-CNO			W	0.730994	1.16441	1.03912	1.87761	1.27902	0.424268	0.878117	1.08656	30.6878			P value	P<0.0001
	10.376	0.0217				10.376	0.00182					hM3Dq+CNO											Groups	P value
	10.376	0.0435				10.376	0.00364				IL	6.56506	1.06383	0.371747	53.2738	8.36048	2.42086	19.7492	15.4502	37.9195		IL	hM3Dq+NS VS hM3Dq+CNO	<0.0001
	10.376	0.0652				10.376	0.00545				S	88.2767	94.0426	91.0037	44.5436	89.468	95.9032	75.2351	82.2749	58.7248		S	hM3Dq+NS VS hM3Dq+CNO	<0.0001
	10.376	0.087				10.376	0.00727				W	5.15827	4.89362	8.62453	2.18254	2.17155	1.67598	5.01567	2.27488	3.3557		W	hM3Dq+NS VS hM3Dq+CNO	0.9998
	10.376	0.108696				10.376	0.00909					hM3Dq+NS
	10.376	0.130435				10.376	0.0109				IL	29.4083	47.1621	38.0175	40.0622	45.7332	27.291	42.3078	36.7153	47.8342			ANOVA summary
	10.376	0.152174				10.376	0.0127				S	45.0296	26.5956	30.0331	29.4481	15.0247	27.8252	28.4269	26.2067	29.5836			F	1.167
	10.376	0.173913				10.376	0.0145				W	25.5621	26.2423	31.9495	30.4897	39.242	44.8838	29.2653	37.078	22.5823			P value	0.32
	10.376	0.195652				10.376	0.0164					hM3Dq+CNO											Groups	P value
	10.376	0.217391				10.376	0.0182				IL	28.6863	34.8937	29.473	33.6381	21.4994	38.7412	33.9647	26.9006	24.4289		IL	hM3Dq+NS VS hM3Dq+CNO	0.0103
	10.376	0.23913				10.376	0.02				S	40.7843	33.8619	46.4363	36.7834	43.333	29.3124	37.9677	35.8663	41.3355		S	hM3Dq+NS VS hM3Dq+CNO	0.0059
	10.376	0.26087				10.376	0.0218				W	30.5294	31.2444	24.0908	29.5786	35.1676	31.9464	28.0676	37.2331	34.2356		W	hM3Dq+NS VS hM3Dq+CNO	0.9964
	10.376	0.282609				10.376	0.0236
	10.9863	0.304348				10.376	0.0255				Figure5h												ANOVA summary
	10.9863	0.326087				10.376	0.0273				NCI	23.5	24	24	23	24	23.5	25	22	22.5			F	60.08
	10.9863	0.347826				10.376	0.0291				hM4Di+NS	23.5	25	24.5	23.5	23.5	21	24.5	22	25.5			P value	P<0.0001
	10.9863	0.369565				10.376	0.0309				hM4Di+CNO	33.5	29	28.5	28.5	31.5	33.5	33	28.5	31			Groups	P value
	10.9863	0.391304				10.376	0.0327																CON VS hM4Di+NS	0.9653
	10.9863	0.413044				10.376	0.0345																CON VS hM4Di+CNO	<0.0001
	11.5967	0.434783				10.376	0.0364
	11.5967	0.456522				10.376	0.0382				Figure5i	hM4Di+NS
	11.5967	0.478261				10.376	0.04				IL	15.7636	19.6051	32.0721	9.98363	19.5925	44.6043	44.6429	59.7173	41.6877			ANOVA summary
	11.5967	0.5				10.376	0.0418				S	77.8325	76.8688	64.1441	85.1064	76.8025	53.0935	42.8571	37.4558	55.5416			F	97.52
	11.5967	0.521739				10.376	0.0436				W	6.40394	3.52609	3.78378	4.90998	3.60502	2.30216	12.5	2.82686	2.77078			P value	P<0.0001
	11.5967	0.543478				10.376	0.0455					hM4Di+CNO											Groups	P value
	11.5967	0.565217				10.376	0.0473				IL	95.5768	91.8806	59.9099	96.892	77.0642	95.4809	91.2148	95.026	75.8475		IL	hM4Di+NS VS hM4Di+CNO	<0.0001
	11.5967	0.586957				10.376	0.0491				S	3.40705	7.00902	19.3694	2.18102	20.1835	3.2445	7.34386	3.78619	21.0452		S	hM4Di+NS VS hM4Di+CNO	<0.0001
	11.5967	0.608696				10.376	0.0509				W	1.01614	1.11034	20.7207	0.926936	2.75229	1.27462	1.44132	1.18782	3.10735		W	hM4Di+NS VS hM4Di+CNO	0.9971
	12.207	0.630435				10.376	0.0527					hM4Di+NS
	12.207	0.652174				10.376	0.0545				IL	24.7713	31.6031	26.1715	35.9195	27.2636	33.5849	28.4545	31.6085	25.6537			ANOVA summary
	12.207	0.673913				10.376	0.0564				S	41.8031	43.6686	36.1411	35.5679	44.8654	32.2837	40.7077	35.7103	35.9696			F	1.739
	12.207	0.695652				10.376	0.0582				W	33.4256	24.7283	37.6874	28.5126	27.871	34.1315	30.8378	32.6813	38.3766			P value	0.1866
	12.207	0.717391				10.376	0.06					hM4Di+CNO											Groups	P value
	12.207	0.73913				10.376	0.0618				IL	41.0823	33.2712	43.1928	35.7874	34.1815	48.4947	50.8029	35.2115	35.7132		IL	hM4Di+NS VS hM4Di+CNO	0.0002
	12.8174	0.76087				10.376	0.0636				S	26.0433	31.527	23.6801	35.9124	31.7104	25.7284	20.0752	39.727	27.6371		S	hM4Di+NS VS hM4Di+CNO	0.0007
	13.4277	0.782609				10.376	0.0655				W	32.8743	35.2018	33.1271	28.3002	34.1081	25.777	29.1219	25.0615	36.6497		W	hM4Di+NS VS hM4Di+CNO	0.9753
	13.4277	0.804348				10.376	0.0673
	13.4277	0.826087				10.376	0.0691				Figure5g							Figure5j
	13.4277	0.847826				10.376	0.0709					Food zone time (%)	Food intake percentage (%)						Food zone time (%)	Food intake percentage (%)
	14.0381	0.869565				10.376	0.0727					29.4083	96.4912		Correlation/Linear reg.				24.7713	15.7635		Correlation/Linear reg.
	14.0381	0.891304				10.376	0.0745					47.1621	98.6493		F	14.95			31.6031	6.40394		F	7.863
	14.6484	0.913044				10.376	0.0764					38.0175	94.3154		r	0.5527			26.1715	74.0893		r	0.4557
	14.6484	0.934783				10.376	0.0782					40.0622	97.9138		P value	0.0005			35.9195	9.98363		P value	0.0088
	15.2588	0.956522				10.376	0.08					45.7332	95.3103		R squared	0.3054			27.2636	19.5925		R squared	0.2077
	15.8691	0.978261				10.376	0.0818					27.291	98.5999						33.5849	51.5723
	18.9209	1				10.376	0.0836					42.3078	41.6877						28.4545	97.4771
	10.376		0.0143			10.376	0.0855					36.7153	98.7706						31.6085	89.9382
	10.376		0.0286			10.376	0.0873					47.8342	98.3339						41.0823	95.5768
	10.376		0.0429			10.376	0.0891					28.6863	6.56506						33.2712	99.0766
	10.376		0.0571			10.376	0.0909					34.8937	1.06383						43.1928	59.9099
	10.376		0.0714			10.9863	0.0927					29.473	0.371747						35.7874	96.892
	10.376		0.0857			10.9863	0.0945					33.6381	53.2738						34.1815	63.7681
	10.376		0.1			10.9863	0.0964					21.4994	8.36048						48.4947	95.4809
	10.376		0.114286			10.9863	0.0982					38.7412	2.42086						50.8029	97.9366
	10.376		0.128571			10.9863	0.1					33.9647	25.4408						35.2115	97.9342
	10.376		0.142857			10.9863	0.101818					26.9006	19.7492						41.8031	77.8325
	10.376		0.157143			10.9863	0.103636					24.4289	15.4502						43.6686	89.491
	10.376		0.171429			10.9863	0.105455					45.0296	2.77778						36.1411	24.4674
	10.9863		0.185714			10.9863	0.107273					26.5956	0.186306						35.5679	85.1064
	10.9863		0.2			10.9863	0.109091					30.0331	4.64548						44.8654	76.8025
	10.9863		0.214286			10.9863	0.110909					29.4481	0.208623						32.2837	46.4151
	10.9863		0.228571			10.9863	0.112727					15.0247	3.41071						40.7077	0.917431
	10.9863		0.242857			10.9863	0.114546					27.8252	0.975817						35.7103	9.35569
	10.9863		0.257143			10.9863	0.116364					28.4269	55.5416						26.0433	3.40705
	10.9863		0.271429			10.9863	0.118182					26.2067	0.351247						31.527	0.0543183
	11.5967		0.285714			10.9863	0.12					29.5836	0.5795						23.6801	19.3694
	11.5967		0.3			10.9863	0.121818					40.7843	88.2767						35.9124	2.18103
	11.5967		0.314286			10.9863	0.123636					33.8619	94.0426						31.7104	31.8841
	11.5967		0.328571			10.9863	0.125455					46.4363	91.0037						25.7284	3.2445
	11.5967		0.342857			10.9863	0.127273					36.7834	44.5437						20.0752	0.515844
	11.5967		0.357143			10.9863	0.129091					43.333	89.468						39.727	0.841622
	12.207		0.371429			10.9863	0.130909					29.3124	95.9032
	12.207		0.385714			10.9863	0.132727					37.9677	69.5214
	12.207		0.4			10.9863	0.134546					35.8663	75.2351
	12.207		0.414286			10.9863	0.136364					41.3355	82.2749
	12.207		0.428571			10.9863	0.138182
	12.207		0.442857			10.9863	0.14
	12.8174		0.457143			10.9863	0.141818
	12.8174		0.471429			10.9863	0.143636
	12.8174		0.485714			10.9863	0.145455
	12.8174		0.5			10.9863	0.147273
	13.4277		0.514286			10.9863	0.149091
	13.4277		0.528571			10.9863	0.150909
	13.4277		0.542857			10.9863	0.152727
	13.4277		0.557143			10.9863	0.154546
	13.4277		0.571429			10.9863	0.156364
	13.4277		0.585714			10.9863	0.158182
	13.4277		0.6			10.9863	0.16
	14.0381		0.614286			10.9863	0.161818
	14.0381		0.628572			10.9863	0.163636
	14.0381		0.642857			10.9863	0.165455
	14.0381		0.657143			10.9863	0.167273
	14.6484		0.671429			10.9863	0.169091
	14.6484		0.685714			10.9863	0.170909
	14.6484		0.7			10.9863	0.172727
	15.2588		0.714286			10.9863	0.174546
	15.2588		0.728571			10.9863	0.176364
	15.2588		0.742857			10.9863	0.178182
	15.2588		0.757143			10.9863	0.18
	15.8691		0.771429			10.9863	0.181818
	15.8691		0.785714			10.9863	0.183636
	16.4795		0.8			10.9863	0.185455
	17.0898		0.814286			10.9863	0.187273
	17.0898		0.828571			10.9863	0.189091
	17.7002		0.842857			10.9863	0.190909
	17.7002		0.857143			10.9863	0.192727
	18.3105		0.871429			10.9863	0.194545
	19.5312		0.885714			10.9863	0.196364
	19.5312		0.9			10.9863	0.198182
	20.752		0.914286			11.5967	0.2
	21.3623		0.928571			11.5967	0.201818
	22.583		0.942857			11.5967	0.203636
	22.583		0.957143			11.5967	0.205455
	22.583		0.971429			11.5967	0.207273
	23.1934		0.985714			11.5967	0.209091
	28.6865		1			11.5967	0.210909
						11.5967	0.212727
						11.5967	0.214546
						11.5967	0.216364
						11.5967	0.218182
						11.5967	0.22
						11.5967	0.221818
						11.5967	0.223636
						11.5967	0.225455
						11.5967	0.227273
						11.5967	0.229091
						11.5967	0.230909
						11.5967	0.232727
						11.5967	0.234546
						11.5967	0.236364
						11.5967	0.238182
						11.5967	0.24
						11.5967	0.241818
						11.5967	0.243636
						11.5967	0.245455
						11.5967	0.247273
						11.5967	0.249091
						11.5967	0.250909
						11.5967	0.252727
						11.5967	0.254546
						11.5967	0.256364
						11.5967	0.258182
						11.5967	0.26
						11.5967	0.261818
						11.5967	0.263636
						11.5967	0.265455
						11.5967	0.267273
						11.5967	0.269091
						11.5967	0.270909
						11.5967	0.272727
						11.5967	0.274546
						11.5967	0.276364
						11.5967	0.278182
						12.207	0.28
						12.207	0.281818
						12.207	0.283636
						12.207	0.285455
						12.207	0.287273
						12.207	0.289091
						12.207	0.290909
						12.207	0.292727
						12.207	0.294545
						12.207	0.296364
						12.207	0.298182
						12.207	0.3
						12.207	0.301818
						12.207	0.303636
						12.207	0.305455
						12.207	0.307273
						12.207	0.309091
						12.207	0.310909
						12.207	0.312727
						12.207	0.314546
						12.207	0.316364
						12.207	0.318182
						12.207	0.32
						12.207	0.321818
						12.207	0.323636
						12.207	0.325455
						12.207	0.327273
						12.207	0.329091
						12.207	0.330909
						12.207	0.332727
						12.207	0.334546
						12.207	0.336364
						12.207	0.338182
						12.207	0.34
						12.207	0.341818
						12.207	0.343636
						12.207	0.345455
						12.207	0.347273
						12.207	0.349091
						12.207	0.350909
						12.207	0.352727
						12.207	0.354545
						12.207	0.356364
						12.207	0.358182
						12.207	0.36
						12.207	0.361818
						12.207	0.363636
						12.207	0.365455
						12.207	0.367273
						12.207	0.369091
						12.207	0.370909
						12.207	0.372727
						12.207	0.374546
						12.207	0.376364
						12.207	0.378182
						12.207	0.38
						12.207	0.381818
						12.8174	0.383636
						12.8174	0.385455
						12.8174	0.387273
						12.8174	0.389091
						12.8174	0.390909
						12.8174	0.392727
						12.8174	0.394546
						12.8174	0.396364
						12.8174	0.398182
						12.8174	0.4
						12.8174	0.401818
						12.8174	0.403636
						12.8174	0.405455
						12.8174	0.407273
						12.8174	0.409091
						12.8174	0.410909
						12.8174	0.412727
						12.8174	0.414545
						12.8174	0.416364
						12.8174	0.418182
						12.8174	0.42
						12.8174	0.421818
						12.8174	0.423636
						12.8174	0.425455
						12.8174	0.427273
						12.8174	0.429091
						12.8174	0.430909
						12.8174	0.432727
						12.8174	0.434546
						12.8174	0.436364
						12.8174	0.438182
						13.4277	0.44
						13.4277	0.441818
						13.4277	0.443636
						13.4277	0.445455
						13.4277	0.447273
						13.4277	0.449091
						13.4277	0.450909
						13.4277	0.452727
						13.4277	0.454546
						13.4277	0.456364
						13.4277	0.458182
						13.4277	0.46
						13.4277	0.461818
						13.4277	0.463636
						13.4277	0.465455
						13.4277	0.467273
						13.4277	0.469091
						13.4277	0.470909
						13.4277	0.472727
						13.4277	0.474545
						13.4277	0.476364
						13.4277	0.478182
						13.4277	0.48
						13.4277	0.481818
						13.4277	0.483636
						13.4277	0.485455
						13.4277	0.487273
						13.4277	0.489091
						13.4277	0.490909
						13.4277	0.492727
						13.4277	0.494546
						13.4277	0.496364
						13.4277	0.498182
						13.4277	0.5
						14.0381	0.501818
						14.0381	0.503636
						14.0381	0.505455
						14.0381	0.507273
						14.0381	0.509091
						14.0381	0.510909
						14.0381	0.512727
						14.0381	0.514545
						14.0381	0.516364
						14.0381	0.518182
						14.0381	0.52
						14.0381	0.521818
						14.0381	0.523636
						14.0381	0.525455
						14.0381	0.527273
						14.0381	0.529091
						14.0381	0.530909
						14.0381	0.532727
						14.0381	0.534546
						14.0381	0.536364
						14.0381	0.538182
						14.0381	0.54
						14.0381	0.541818
						14.0381	0.543636
						14.0381	0.545455
						14.0381	0.547273
						14.0381	0.549091
						14.0381	0.550909
						14.0381	0.552727
						14.0381	0.554546
						14.0381	0.556364
						14.0381	0.558182
						14.0381	0.56
						14.0381	0.561818
						14.0381	0.563636
						14.0381	0.565455
						14.6484	0.567273
						14.6484	0.569091
						14.6484	0.570909
						14.6484	0.572727
						14.6484	0.574545
						14.6484	0.576364
						14.6484	0.578182
						14.6484	0.58
						14.6484	0.581818
						14.6484	0.583636
						14.6484	0.585455
						14.6484	0.587273
						14.6484	0.589091
						14.6484	0.590909
						14.6484	0.592727
						14.6484	0.594546
						14.6484	0.596364
						14.6484	0.598182
						14.6484	0.6
						14.6484	0.601818
						14.6484	0.603636
						14.6484	0.605455
						14.6484	0.607273
						14.6484	0.609091
						14.6484	0.610909
						14.6484	0.612727
						14.6484	0.614546
						14.6484	0.616364
						14.6484	0.618182
						14.6484	0.62
						14.6484	0.621818
						15.2588	0.623636
						15.2588	0.625455
						15.2588	0.627273
						15.2588	0.629091
						15.2588	0.630909
						15.2588	0.632727
						15.2588	0.634545
						15.2588	0.636364
						15.2588	0.638182
						15.2588	0.64
						15.2588	0.641818
						15.2588	0.643636
						15.2588	0.645455
						15.2588	0.647273
						15.2588	0.649091
						15.2588	0.650909
						15.2588	0.652727
						15.2588	0.654545
						15.2588	0.656364
						15.2588	0.658182
						15.2588	0.66
						15.2588	0.661818
						15.2588	0.663636
						15.2588	0.665455
						15.2588	0.667273
						15.2588	0.669091
						15.2588	0.670909
						15.2588	0.672727
						15.2588	0.674546
						15.2588	0.676364
						15.2588	0.678182
						15.2588	0.68
						15.2588	0.681818
						15.2588	0.683636
						15.2588	0.685455
						15.8691	0.687273
						15.8691	0.689091
						15.8691	0.690909
						15.8691	0.692727
						15.8691	0.694545
						15.8691	0.696364
						15.8691	0.698182
						15.8691	0.7
						15.8691	0.701818
						15.8691	0.703636
						15.8691	0.705455
						15.8691	0.707273
						15.8691	0.709091
						15.8691	0.710909
						15.8691	0.712727
						15.8691	0.714545
						15.8691	0.716364
						15.8691	0.718182
						16.4795	0.72
						16.4795	0.721818
						16.4795	0.723636
						16.4795	0.725455
						16.4795	0.727273
						16.4795	0.729091
						16.4795	0.730909
						16.4795	0.732727
						16.4795	0.734546
						16.4795	0.736364
						16.4795	0.738182
						16.4795	0.74
						16.4795	0.741818
						16.4795	0.743636
						16.4795	0.745455
						16.4795	0.747273
						16.4795	0.749091
						16.4795	0.750909
						16.4795	0.752727
						16.4795	0.754546
						16.4795	0.756364
						16.4795	0.758182
						17.0898	0.76
						17.0898	0.761818
						17.0898	0.763636
						17.0898	0.765455
						17.0898	0.767273
						17.0898	0.769091
						17.0898	0.770909
						17.0898	0.772727
						17.0898	0.774545
						17.0898	0.776364
						17.0898	0.778182
						17.0898	0.78
						17.0898	0.781818
						17.0898	0.783636
						17.0898	0.785455
						17.0898	0.787273
						17.0898	0.789091
						17.0898	0.790909
						17.0898	0.792727
						17.0898	0.794546
						17.0898	0.796364
						17.0898	0.798182
						17.7002	0.8
						17.7002	0.801818
						17.7002	0.803636
						17.7002	0.805455
						17.7002	0.807273
						17.7002	0.809091
						17.7002	0.810909
						17.7002	0.812727
						17.7002	0.814546
						17.7002	0.816364
						17.7002	0.818182
						17.7002	0.82
						17.7002	0.821818
						17.7002	0.823636
						17.7002	0.825455
						17.7002	0.827273
						17.7002	0.829091
						17.7002	0.830909
						18.3105	0.832727
						18.3105	0.834545
						18.3105	0.836364
						18.3105	0.838182
						18.3105	0.84
						18.3105	0.841818
						18.3105	0.843636
						18.3105	0.845455
						18.3105	0.847273
						18.3105	0.849091
						18.3105	0.850909
						18.3105	0.852727
						18.3105	0.854546
						18.3105	0.856364
						18.9209	0.858182
						18.9209	0.86
						18.9209	0.861818
						18.9209	0.863636
						18.9209	0.865455
						18.9209	0.867273
						18.9209	0.869091
						18.9209	0.870909
						18.9209	0.872727
						18.9209	0.874546
						18.9209	0.876364
						19.5312	0.878182
						19.5312	0.88
						19.5312	0.881818
						19.5312	0.883636
						19.5312	0.885455
						19.5312	0.887273
						19.5312	0.889091
						19.5312	0.890909
						19.5312	0.892727
						19.5312	0.894545
						19.5312	0.896364
						20.1416	0.898182
						20.1416	0.9
						20.1416	0.901818
						20.1416	0.903636
						20.1416	0.905455
						20.1416	0.907273
						20.1416	0.909091
						20.752	0.910909
						20.752	0.912727
						20.752	0.914546
						20.752	0.916364
						20.752	0.918182
						20.752	0.92
						20.752	0.921818
						21.3623	0.923636
						21.3623	0.925455
						21.3623	0.927273
						21.3623	0.929091
						21.3623	0.930909
						21.3623	0.932727
						21.3623	0.934546
						21.9727	0.936364
						21.9727	0.938182
						21.9727	0.94
						21.9727	0.941818
						21.9727	0.943636
						21.9727	0.945455
						22.583	0.947273
						22.583	0.949091
						23.1934	0.950909
						23.1934	0.952727
						23.1934	0.954545
						23.8037	0.956364
						23.8037	0.958182
						23.8037	0.96
						23.8037	0.961818
						23.8037	0.963636
						23.8037	0.965455
						24.4141	0.967273
						24.4141	0.969091
						25.0244	0.970909
						26.2451	0.972727
						26.2451	0.974546
						26.8555	0.976364
						26.8555	0.978182
						26.8555	0.98
						27.4658	0.981818
						27.4658	0.983636
						30.5176	0.985455
						31.1279	0.987273
						31.7383	0.989091
						32.3486	0.990909
						33.5693	0.992727
						39.0625	0.994546
						42.1142	0.996364
						43.335	0.998182
						59.8145	1
						10.376		0.0069
						10.376		0.013793
						10.376		0.0207
						10.376		0.0276
						10.376		0.0345
						10.376		0.0414
						10.376		0.0483
						10.376		0.0552
						10.376		0.0621
						10.376		0.069
						10.376		0.0759
						10.376		0.0828
						10.376		0.0897
						10.376		0.0966
						10.376		0.103448
						10.376		0.110345
						10.376		0.117241
						10.376		0.124138
						10.376		0.131035
						10.376		0.137931
						10.376		0.144828
						10.376		0.151724
						10.376		0.158621
						10.376		0.165517
						10.376		0.172414
						10.376		0.17931
						10.376		0.186207
						10.376		0.193103
						10.376		0.2
						10.376		0.206897
						10.9863		0.213793
						10.9863		0.22069
						10.9863		0.227586
						10.9863		0.234483
						10.9863		0.241379
						10.9863		0.248276
						10.9863		0.255172
						10.9863		0.262069
						10.9863		0.268966
						10.9863		0.275862
						10.9863		0.282759
						10.9863		0.289655
						10.9863		0.296552
						10.9863		0.303448
						10.9863		0.310345
						10.9863		0.317241
						10.9863		0.324138
						10.9863		0.331035
						10.9863		0.337931
						11.5967		0.344828
						11.5967		0.351724
						11.5967		0.358621
						11.5967		0.365517
						11.5967		0.372414
						11.5967		0.37931
						11.5967		0.386207
						11.5967		0.393104
						11.5967		0.4
						11.5967		0.406897
						12.207		0.413793
						12.207		0.42069
						12.207		0.427586
						12.207		0.434483
						12.207		0.441379
						12.207		0.448276
						12.207		0.455172
						12.207		0.462069
						12.207		0.468966
						12.207		0.475862
						12.207		0.482759
						12.207		0.489655
						12.207		0.496552
						12.207		0.503448
						12.8174		0.510345
						12.8174		0.517241
						12.8174		0.524138
						12.8174		0.531035
						12.8174		0.537931
						12.8174		0.544828
						12.8174		0.551724
						12.8174		0.558621
						12.8174		0.565517
						12.8174		0.572414
						12.8174		0.57931
						12.8174		0.586207
						12.8174		0.593104
						12.8174		0.6
						12.8174		0.606897
						13.4277		0.613793
						13.4277		0.62069
						13.4277		0.627586
						13.4277		0.634483
						13.4277		0.641379
						13.4277		0.648276
						13.4277		0.655172
						13.4277		0.662069
						13.4277		0.668966
						13.4277		0.675862
						13.4277		0.682759
						14.0381		0.689655
						14.0381		0.696552
						14.0381		0.703448
						14.0381		0.710345
						14.0381		0.717241
						14.0381		0.724138
						14.0381		0.731035
						14.0381		0.737931
						14.0381		0.744828
						14.6484		0.751724
						14.6484		0.758621
						14.6484		0.765517
						14.6484		0.772414
						14.6484		0.77931
						14.6484		0.786207
						15.2588		0.793104
						15.2588		0.8
						15.2588		0.806897
						15.2588		0.813793
						15.2588		0.82069
						15.8691		0.827586
						15.8691		0.834483
						15.8691		0.841379
						15.8691		0.848276
						15.8691		0.855172
						15.8691		0.862069
						16.4795		0.868966
						16.4795		0.875862
						16.4795		0.882759
						17.0898		0.889655
						17.0898		0.896552
						17.0898		0.903448
						17.0898		0.910345
						17.0898		0.917241
						17.0898		0.924138
						17.7002		0.931035
						17.7002		0.937931
						18.3105		0.944828
						19.5312		0.951724
						19.5312		0.958621
						19.5312		0.965517
						20.752		0.972414
						20.752		0.97931
						21.3623		0.986207
						22.583		0.993103
						26.8555		1

## Sheet: Figure6
Figure6b
		CON							ANOVA summary
	CCKAR	0.797205	0.706868	0.803797	1.19249	1.22158	1.27807		F	15.01
	CCKBR	0.903783	0.571587	0.615555	1.16626	1.40657	1.33625		P value	0.0009
		NCI							Groups	P value
	CCKAR	0.614268	1.00144	1.12506	1.07488	0.89552	0.549916		CON VS NCI	0.7944
	CCKBR	1.51507	1.35312	2.01593	1.9928	2.58049	2.40468		CON VS NCI	0.0002
Figure6c		CON							ANOVA summary
	CCKAR	0.85136	0.546782	1.64285	1.3259	0.936485	0.696624		F	11.19
	CCKBR	0.935631	0.524697	0.685427	1.54602	0.496372	1.81185		P value	0.0032
		NCI							Groups	P value
	CCKAR	2.15637	2.25634	0.863549	1.63541	0.932456	0.712586		CON VS NCI	0.4818
	CCKBR	3.54812	2.67502	2.10246	3.64852	4.6742	2.8041		CON VS NCI	<0.0001
Figure6e										ANOVA summary
										F	77.4
NCI	25	23.5	25	25.5	22	23	26.5	22		P value	<0.0001
NS	23	25	25	25.5	26	25	22.5	22		Groups	P value
Proglumide sodium	30	32.5	33.5	31	33	31.5	32.5	33.5		NCI VS NCI+NS	0.9549
										NCI VS NCI+Proglumide sodium	<0.0001
										ANOVA summary
Figure6f										F	29.79
CON	28.6667	27.3333	32	26.6667	28	26.6667	27.3333	31.3333		P value	<0.0001
NS	28.6667	31.3333	28	26.6667	28	28	27.3333	26.6667		Groups	P value
Tetragastrin	24.6667	24	23.3333	20.6667	21.3333	22.6667	23.3333	21.3333		CON VS CON+NS	0.8398
										CON VS CON+Tetragastrin	<0.0001
Figure6h	CCKBR++Glu+/Glu+
	90
	80.7692
	95.8333
	90
	88.8889
	90.9091

## Sheet: Figure7
Figure7c							Figure7f							Figure7i												ANOVA summary
	ACSF	ACSF+CNO	ACSF+CNO+Pro	ANOVA summary				ACSF	ACSF+CNO	ACSF+CNO+Te	ANOVA summary			hM3Dq+NS	32	32.5	32	31.5	33	34	32	32	29			F	148.1
	-9.3724	-10.0038	-8.3043	F	36.93			-7.29767	-5.46887	-8.1368	F	5.288		hM3Dq+CNO	24.5	24.5	23.5	22	24.5	25.5	25	26	32.5			P value	<0.0001
	-10.8756	-12.406	-9.8424	P value	<0.0001			-8.03279	-6.39179	-10.3973	P value	0.0183		hM3Dq+CNO+Pro	31	32	31.5	31	32	29.5	31	32.5	25			Groups	P value
	-8.27614	-9.9966	-7.72024	Groups	P value			-9.2038	-4.08487	-8.5792	Groups	P value														hM3Dq+NS VS hM3Dq+CNO	<0.0001
	-11.917	-15.4415	-10.917	ACSF VS ACSF+CNO	0.0008			-8.30824	-6.17058	-9.3425	ACSF VS ACSF+CNO	0.0447														hM3Dq+CNO VS hM3Dq+CNO+Pro	<0.0001
	-8.98524	-11.195	-9.32834	ACSF+CNO VS ACSF+CNO+Pro	0.0009			-14.8933	-8.95063	-11.4586	ACSF+CNO VS ACSF+CNO+Tet	0.0252		Figure7j
	-3.4153	-5.4631	-5.13315					-9.00537	-7.2562	-10.8807					hM3Dq+NS											ANOVA summary
	-4.78603	-7.97389	-7.42679											IL	98.0454	89.7363	93.1883	88.5481	94.707	93.3475	97.3629	98.2389				F	227.4
	-13.8939	-15.9249	-12.9776											S	1.38714	5.70207	5.60962	7.97546	4.63138	6.38638	2.00422	1.14854				P value	<0.0001
														W	0.567465	4.56165	1.20206	3.47648	0.661626	0.266099	0.632911	0.612557				Groups	P value
	Interval (ms)	ACSF	ACSF+CNO	ACSF+CNO+Pro				Interval (ms)	ACSF	ACSF+CNO+Tet	ACSF+CNO				hM3Dq+CNO										IL	hM3Dq+NS VS hM3Dq+CNO	<0.0001
	10.376	0.00394						10.376	0.0109					IL	39.1892	48.2759	33.3333	45.082	50	89.221	99.1566	96.4872				hM3Dq+CNO VS hM3Dq+CNO+Pro	0.01
	10.376	0.00787						10.376	0.0217					S	52.7027	31.4655	45.8333	52.0492	38.5321	10.2891	0.441767	3.34865			S	hM3Dq+NS VS hM3Dq+CNO	0.0011
	10.376	0.0118						10.376	0.032609					W	8.10811	20.2586	20.8333	2.86885	11.4679	0.489956	0.401606	0.16415				hM3Dq+CNO VS hM3Dq+CNO+Pro	0.016
	10.376	0.0157						10.376	0.0435						hM3Dq+CNO+Pro										W	hM3Dq+NS VS hM3Dq+CNO	0.5888
	10.376	0.0197						10.376	0.0543					IL	67.7209	56.8918	95.1893	74.3333	88.6836	85.3977	98.1934	95.7816				hM3Dq+CNO VS hM3Dq+CNO+Pro	0.6524
	10.376	0.0236						10.376	0.0652					S	15.1707	17.2405	2.4448	20.5333	8.89146	13.8636	1.70032	2.5641
	10.376	0.0276						10.376	0.0761					W	2.10843	2.86772	2.36593	5.13333	2.42494	0.738636	0.10627	1.65426
	10.376	0.0315						10.376	0.087
	10.376	0.0354						10.376	0.0978						hM3Dq+NS											ANOVA summary
	10.376	0.0394						10.376	0.108696					IL	38.5258	43.0662	33.8805	45.211	29.8947	43.7303	35.7475	37.5038				F	5.074
	10.376	0.0433						10.376	0.119565					S	32.2656	25.6752	24.7143	26.461	26.4421	19.696	29.3921	20.1011				P value	0.0091
	10.376	0.0472						10.376	0.130435					W	29.2087	31.2586	41.4052	28.3279	43.6632	36.5738	34.8604	42.3951				Groups	P value
	10.376	0.051181						10.376	0.141304						hM3Dq+CNO										IL	hM3Dq+NS VS hM3Dq+CNO	0.0022
	10.376	0.0551						10.376	0.152174					IL	30.6253	22.9256	32.2054	38.8615	29.9737	21.6674	26.0484	30.2009				hM3Dq+CNO VS hM3Dq+CNO+Pro	0.0009
	10.376	0.0591						10.376	0.163044					S	35.9741	35.8409	34.6012	29.3102	39.2155	42.0343	34.7792	44.9373			S	hM3Dq+NS VS hM3Dq+CNO	0.0002
	10.376	0.063						10.376	0.173913					W	33.4006	41.2335	33.1933	31.8283	30.8108	36.2983	39.1724	24.8618				hM3Dq+CNO VS hM3Dq+CNO+Pro	0.016
	10.376	0.0669						10.376	0.184783						hM3Dq+CNO+Pro										W	hM3Dq+NS VS hM3Dq+CNO	0.7062
	10.376	0.0709						10.376	0.195652					IL	38.7171	46.0205	31.6056	41.5021	35.1624	42.3188	47.8171	30.5181				hM3Dq+CNO VS hM3Dq+CNO+Pro	0.5931
	10.376	0.0748						10.376	0.206522					S	28.8651	24.7954	35.7944	34.1491	28.2828	31.5152	19.3782	33.4991
	10.376	0.0787						10.376	0.217391					W	32.4178	29.1841	32.6001	24.3488	36.5548	26.166	32.8048	35.9827
	10.376	0.0827						10.376	0.228261
	10.376	0.0866						10.376	0.23913
	10.9863	0.0906						10.376	0.25					Figure7l												ANOVA summary
	10.9863	0.0945						10.376	0.26087					hM4Di+NS	24.5	25	25.5	23	24.5	22	26	26				F	67.39
	10.9863	0.0984						10.9863	0.271739					hM4Di+CNO	33	31.5	30	29	31	31	31.5	32.5				P value	<0.0001
	10.9863	0.102362						10.9863	0.282609					hM4Di+CNO+Tet	25.5	25	26.5	25	24.5	26.5	27	25				Groups	P value
	10.9863	0.106299						10.9863	0.293478																	hM4Di+NS VS hM4Di+CNO	<0.0001
	10.9863	0.110236						10.9863	0.304348																	hM4Di+CNO VS hM4Di+CNO+Tet	<0.0001
	10.9863	0.114173						10.9863	0.315217					Figure7j
	10.9863	0.11811						10.9863	0.326087						hM4Di+NS											ANOVA summary
	10.9863	0.122047						10.9863	0.336957					IL	5.65217	14.0893	36.862	19.0244	24.3034	16.6172	12.234	4.60123				F	77.83
	10.9863	0.125984						10.9863	0.347826					S	69.1304	51.2028	48.3932	70.7317	68.7306	77.1513	83.2447	91.1043				P value	<0.0001
	10.9863	0.129921						11.5967	0.358696					W	25.2174	34.7079	14.7448	10.2439	6.96594	6.23145	4.52128	4.29448				Groups	P value
	10.9863	0.133858						11.5967	0.369565						hM4Di+CNO										IL	hM4Di+NS VS hM4Di+CNO	<0.0001
	10.9863	0.137795						11.5967	0.380435					IL	61.9632	66.2577	89.2759	96.0396	82.2139	82.9317	80.7588	85.567				hM4Di+CNO VS hM4Di+CNO+Tet	0.0151
	10.9863	0.141732						11.5967	0.391304					S	3.68098	20.8589	9.07424	1.44014	15.2985	10.0402	15.7182	11.0825			S	hM4Di+NS VS hM4Di+CNO	<0.0001
	10.9863	0.145669						11.5967	0.402174					W	34.3558	12.8834	1.64986	2.52025	2.48756	7.02811	3.52304	3.35052				hM4Di+CNO VS hM4Di+CNO+Tet	0.0095
	10.9863	0.149606						11.5967	0.413044						hM4Di+CNO+Tet										W	hM4Di+NS VS hM4Di+CNO	0.705
	10.9863	0.153543						11.5967	0.423913					IL	40.9836	62.0513	84.7926	84.5494	39.4161	79.4737	49.3056	63.7584				hM4Di+CNO VS hM4Di+CNO+Tet	0.9846
	10.9863	0.15748						11.5967	0.434783					S	40.9836	22.5641	13.3641	13.0901	51.8248	17.6316	43.75	32.8859
	11.5967	0.161417						11.5967	0.445652					W	18.0328	15.3846	1.84332	2.36051	8.75912	2.89474	6.94444	3.3557
	11.5967	0.165354						11.5967	0.456522
	11.5967	0.169291						11.5967	0.467391						hM4Di+NS											ANOVA summary
	11.5967	0.173228						12.207	0.478261					IL	24.7512	27.7638	45.1875	27.6109	24.4579	37.5799	20.4758	24.7975				F	1.43
	11.5967	0.177165						12.207	0.48913					S	41.5483	41.6586	29.2721	36.4425	42.6677	21.0284	51.0116	40.1252				P value	0.247
	11.5967	0.181102						12.207	0.5					W	33.7005	30.5776	25.5404	35.9465	32.8744	41.3917	28.5127	35.0773				Groups	P value
	11.5967	0.185039						12.207	0.51087						hM4Di+CNO										IL	hM4Di+NS VS hM4Di+CNO	0.0127
	11.5967	0.188976						12.207	0.521739					IL	44.4257	26.155	46.286	26.3879	45.5635	36.2814	39.0689	49.5256				hM4Di+CNO VS hM4Di+CNO+Tet	0.0034
	11.5967	0.192913						12.207	0.532609					S	27.7922	36.5402	25.3252	37.2651	19.387	30.3638	32.9348	23.5313			S	hM4Di+NS VS hM4Di+CNO	0.0342
	11.5967	0.19685						12.207	0.543478					W	27.7821	37.3048	28.3888	36.347	35.0495	33.3548	27.9963	26.9431				hM4Di+CNO VS hM4Di+CNO+Tet	0.0198
	11.5967	0.200787						12.207	0.554348						hM4Di+CNO+Tet										W	hM4Di+NS VS hM4Di+CNO	0.9241
	11.5967	0.204724						12.207	0.565217					IL	16.484	28.4484	39.5452	28.0135	31.7771	19.7877	34.6857	21.3026				hM4Di+CNO VS hM4Di+CNO+Tet	0.5898
	11.5967	0.208661						12.207	0.576087					S	45.3963	38.3466	33.7611	41.5917	31.3344	48.0836	29.4544	41.6586
	11.5967	0.212598						12.207	0.586957					W	38.1197	33.2049	36.6936	30.3949	36.8885	32.1286	35.8599	37.0388
	11.5967	0.216535						12.207	0.597826
	11.5967	0.220472						12.8174	0.608696
	11.5967	0.224409						12.8174	0.619565					Figure7k						Figure7n
	11.5967	0.228347						12.8174	0.630435						Food zone time (%)	Food intake percentage (%)					Food zone time (%)	Food intake percentage (%)
	11.5967	0.232284						12.8174	0.641304						38.5258	98.0454					24.7512	5.65217
	12.207	0.236221						12.8174	0.652174						43.0662	89.7363		Correlation/Linear reg.			27.7638	14.0893		Correlation/Linear reg.
	12.207	0.240158						13.4277	0.663044						33.8805	93.1883		F	7.081		45.1875	36.862		F	4.88
	12.207	0.244095						13.4277	0.673913						45.211	88.5481		r	0.3652		27.6109	19.0244		r	0.3097
	12.207	0.248032						13.4277	0.684783						29.8947	94.707		P value	0.0107		24.4579	24.3034		P value	0.0322
	12.207	0.251969						13.4277	0.695652						43.7303	93.3475		R squared	0.1334		37.5799	16.6172		R squared	0.09591
	12.207	0.255906						13.4277	0.706522						35.7475	97.3629					20.4758	12.234
	12.207	0.259843						13.4277	0.717391						37.5038	98.2389					24.7975	4.60123
	12.207	0.26378						13.4277	0.728261						30.6253	39.1892					44.4257	61.9632
	12.207	0.267717						14.0381	0.73913						22.9256	48.2759					26.155	66.2577
	12.207	0.271654						14.0381	0.75						32.2054	33.3333					46.286	89.2759
	12.207	0.275591						14.0381	0.76087						38.8615	45.082					26.3879	96.0396
	12.207	0.279528						14.0381	0.771739						29.9737	50					45.5635	82.2139
	12.207	0.283465						14.0381	0.782609						21.6674	89.221					36.2814	82.9317
	12.207	0.287402						14.0381	0.793478						26.0484	99.1566					39.0689	80.7588
	12.207	0.291339						14.0381	0.804348						30.2009	96.4872					49.5256	85.567
	12.207	0.295276						14.6484	0.815217						38.7171	67.7209					16.484	40.9836
	12.207	0.299213						14.6484	0.826087						46.0205	56.8918					28.4484	62.0513
	12.207	0.30315						14.6484	0.836957						31.6056	95.1893					39.5452	84.7926
	12.207	0.307087						14.6484	0.847826						41.5021	74.3333					28.0135	84.5494
	12.207	0.311024						14.6484	0.858696						35.1624	88.6836					31.7771	39.4161
	12.207	0.314961						15.2588	0.869565						42.3188	85.3977					19.7877	79.4737
	12.207	0.318898						15.2588	0.880435						47.8171	98.1934					34.6857	49.3056
	12.8174	0.322835						16.4795	0.891304						30.5181	95.7816					21.3026	63.7584
	12.8174	0.326772						16.4795	0.902174						32.2656	1.38714					41.5483	69.1304
	12.8174	0.330709						17.0898	0.913044						25.6752	5.70207					41.6586	51.2027
	12.8174	0.334646						17.0898	0.923913						24.7143	5.60962					29.2721	48.3932
	12.8174	0.338583						18.3105	0.934783						26.461	7.97546					36.4425	70.7317
	12.8174	0.34252						18.3105	0.945652						26.4421	4.63138					42.6677	68.7307
	12.8174	0.346457						18.9209	0.956522						19.696	6.38638					21.0284	77.1513
	12.8174	0.350394						19.5312	0.967391						29.3921	2.00422					51.0116	83.2447
	12.8174	0.354331						19.5312	0.978261						20.1011	1.14855					40.1252	91.1043
	12.8174	0.358268						22.583	0.98913						35.9741	52.7027					27.7922	3.68098
	13.4277	0.362205						22.583	1						35.8409	31.4655					36.5402	20.8589
	13.4277	0.366142						10.376		0.0069					34.6012	45.8333					25.3252	9.07424
	13.4277	0.370079						10.376		0.013793					29.3102	52.0492					37.2651	1.44014
	13.4277	0.374016						10.376		0.0207					39.2155	38.5321					19.387	15.2985
	13.4277	0.377953						10.376		0.0276					42.0343	10.2891					30.3638	10.0402
	13.4277	0.38189						10.376		0.0345					34.7792	0.441767					32.9348	15.7182
	13.4277	0.385827						10.376		0.0414					44.9373	3.34865					23.5313	11.0825
	13.4277	0.389764						10.376		0.0483					28.8651	30.1707					45.3963	40.9836
	13.4277	0.393701						10.376		0.0552					24.7954	40.2405					38.3466	22.5641
	13.4277	0.397638						10.376		0.0621					35.7944	2.44479					23.7611	13.3641
	13.4277	0.401575						10.376		0.069					34.1491	20.5333					41.5917	13.0901
	13.4277	0.405512						10.376		0.0759					28.2828	8.89145					31.3344	51.8248
	13.4277	0.409449						10.376		0.0828					31.5152	13.8636					48.0836	17.6316
	13.4277	0.413386						10.376		0.0897					19.3782	1.70032					29.4544	43.75
	14.0381	0.417323						10.376		0.0966					33.4991	2.5641					41.6586	32.8859
	14.0381	0.42126						10.376		0.103448
	14.0381	0.425197						10.376		0.110345
	14.0381	0.429134						10.376		0.117241
	14.0381	0.433071						10.376		0.124138
	14.0381	0.437008						10.376		0.131035
	14.0381	0.440945						10.376		0.137931
	14.0381	0.444882						10.376		0.144828
	14.0381	0.448819						10.376		0.151724
	14.0381	0.452756						10.376		0.158621
	14.0381	0.456693						10.376		0.165517
	14.0381	0.46063						10.376		0.172414
	14.6484	0.464567						10.376		0.17931
	14.6484	0.468504						10.376		0.186207
	14.6484	0.472441						10.376		0.193103
	14.6484	0.476378						10.376		0.2
	14.6484	0.480315						10.376		0.206897
	14.6484	0.484252						10.9863		0.213793
	15.2588	0.488189						10.9863		0.22069
	15.2588	0.492126						10.9863		0.227586
	15.2588	0.496063						10.9863		0.234483
	15.2588	0.5						10.9863		0.241379
	15.2588	0.503937						10.9863		0.248276
	15.2588	0.507874						10.9863		0.255172
	15.8691	0.511811						10.9863		0.262069
	15.8691	0.515748						10.9863		0.268966
	16.4795	0.519685						10.9863		0.275862
	16.4795	0.523622						10.9863		0.282759
	16.4795	0.527559						10.9863		0.289655
	16.4795	0.531496						10.9863		0.296552
	16.4795	0.535433						10.9863		0.303448
	16.4795	0.53937						10.9863		0.310345
	16.4795	0.543307						10.9863		0.317241
	16.4795	0.547244						10.9863		0.324138
	17.0898	0.551181						10.9863		0.331035
	17.0898	0.555118						11.5967		0.337931
	17.0898	0.559055						11.5967		0.344828
	17.0898	0.562992						11.5967		0.351724
	17.0898	0.566929						11.5967		0.358621
	17.0898	0.570866						11.5967		0.365517
	17.0898	0.574803						11.5967		0.372414
	17.0898	0.57874						11.5967		0.37931
	17.7002	0.582677						11.5967		0.386207
	17.7002	0.586614						11.5967		0.393104
	17.7002	0.590551						11.5967		0.4
	18.3105	0.594488						12.207		0.406897
	18.3105	0.598425						12.207		0.413793
	18.3105	0.602362						12.207		0.42069
	18.3105	0.606299						12.207		0.427586
	18.9209	0.610236						12.207		0.434483
	18.9209	0.614173						12.207		0.441379
	18.9209	0.61811						12.207		0.448276
	18.9209	0.622047						12.207		0.455172
	19.5312	0.625984						12.207		0.462069
	19.5312	0.629921						12.207		0.468966
	19.5312	0.633858						12.207		0.475862
	19.5312	0.637795						12.207		0.482759
	20.1416	0.641732						12.207		0.489655
	20.1416	0.645669						12.207		0.496552
	20.1416	0.649606						12.8174		0.503448
	20.752	0.653543						12.8174		0.510345
	21.3623	0.65748						12.8174		0.517241
	21.9727	0.661417						12.8174		0.524138
	21.9727	0.665354						12.8174		0.531035
	21.9727	0.669291						12.8174		0.537931
	21.9727	0.673228						12.8174		0.544828
	22.583	0.677165						12.8174		0.551724
	23.1934	0.681102						12.8174		0.558621
	23.1934	0.685039						12.8174		0.565517
	23.1934	0.688976						12.8174		0.572414
	23.1934	0.692913						12.8174		0.57931
	23.8037	0.69685						12.8174		0.586207
	23.8037	0.700787						12.8174		0.593104
	23.8037	0.704724						12.8174		0.6
	24.4141	0.708661						12.8174		0.606897
	24.4141	0.712598						13.4277		0.613793
	25.0244	0.716535						13.4277		0.62069
	25.6348	0.720473						13.4277		0.627586
	25.6348	0.72441						13.4277		0.634483
	26.2451	0.728347						13.4277		0.641379
	26.2451	0.732284						13.4277		0.648276
	26.8555	0.736221						13.4277		0.655172
	26.8555	0.740158						13.4277		0.662069
	26.8555	0.744095						13.4277		0.668966
	26.8555	0.748032						13.4277		0.675862
	28.0762	0.751969						13.4277		0.682759
	28.0762	0.755906						14.0381		0.689655
	28.0762	0.759843						14.0381		0.696552
	28.0762	0.76378						14.0381		0.703448
	29.2969	0.767717						14.0381		0.710345
	29.2969	0.771654						14.0381		0.717241
	29.2969	0.775591						14.0381		0.724138
	29.2969	0.779528						14.0381		0.731035
	29.9072	0.783465						14.0381		0.737931
	29.9072	0.787402						14.0381		0.744828
	30.5176	0.791339						14.6484		0.751724
	30.5176	0.795276						14.6484		0.758621
	30.5176	0.799213						14.6484		0.765517
	30.5176	0.80315						14.6484		0.772414
	30.5176	0.807087						14.6484		0.77931
	31.1279	0.811024						14.6484		0.786207
	31.1279	0.814961						15.2588		0.793104
	31.1279	0.818898						15.2588		0.8
	31.1279	0.822835						15.2588		0.806897
	31.7383	0.826772						15.2588		0.813793
	31.7383	0.830709						15.2588		0.82069
	31.7383	0.834646						15.8691		0.827586
	31.7383	0.838583						15.8691		0.834483
	31.7383	0.84252						15.8691		0.841379
	32.3486	0.846457						15.8691		0.848276
	32.3486	0.850394						15.8691		0.855172
	32.3486	0.854331						15.8691		0.862069
	32.3486	0.858268						16.4795		0.868966
	32.3486	0.862205						16.4795		0.875862
	32.959	0.866142						16.4795		0.882759
	32.959	0.870079						17.0898		0.889655
	32.959	0.874016						17.0898		0.896552
	32.959	0.877953						17.0898		0.903448
	32.959	0.88189						17.0898		0.910345
	32.959	0.885827						17.0898		0.917241
	33.5693	0.889764						17.0898		0.924138
	33.5693	0.893701						17.7002		0.931035
	33.5693	0.897638						17.7002		0.937931
	33.5693	0.901575						18.3105		0.944828
	34.1797	0.905512						19.5312		0.951724
	34.79	0.909449						19.5312		0.958621
	34.79	0.913386						19.5312		0.965517
	34.79	0.917323						20.752		0.972414
	34.79	0.92126						20.752		0.97931
	35.4004	0.925197						21.3623		0.986207
	35.4004	0.929134						22.583		0.993103
	36.0107	0.933071						26.8555		1
	36.0107	0.937008						10.376			0.00196
	36.0107	0.940945						10.376			0.00391
	36.0107	0.944882						10.376			0.00587
	36.0107	0.948819						10.376			0.00783
	36.0107	0.952756						10.376			0.00978
	36.6211	0.956693						10.376			0.0117
	36.6211	0.96063						10.376			0.0137
	36.6211	0.964567						10.376			0.0157
	36.6211	0.968504						10.376			0.0176
	37.2315	0.972441						10.376			0.0196
	37.2315	0.976378						10.376			0.0215
	37.8418	0.980315						10.376			0.0235
	39.0625	0.984252						10.376			0.0254
	39.6728	0.988189						10.376			0.0274
	39.6728	0.992126						10.376			0.0294
	39.6728	0.996063						10.376			0.0313
	45.7764	1						10.376			0.033268
	10.376		0.00508					10.376			0.0352
	10.376		0.0102					10.376			0.037182
	10.376		0.0152					10.376			0.0391
	10.376		0.0203					10.376			0.0411
	10.376		0.0254					10.376			0.0431
	10.376		0.0305					10.376			0.045
	10.376		0.035533					10.376			0.047
	10.376		0.0406					10.376			0.0489
	10.376		0.0457					10.376			0.0509
	10.376		0.0508					10.376			0.0528
	10.376		0.0558					10.376			0.0548
	10.376		0.060914					10.376			0.0568
	10.376		0.066					10.376			0.0587
	10.376		0.0711					10.376			0.0607
	10.376		0.0761					10.376			0.0626
	10.376		0.0812					10.376			0.0646
	10.376		0.0863					10.376			0.066536
	10.376		0.0914					10.376			0.0685
	10.376		0.096447					10.376			0.07045
	10.376		0.101523					10.376			0.0724
	10.376		0.106599					10.376			0.0744
	10.376		0.111675					10.376			0.0763
	10.376		0.116751					10.376			0.0783
	10.376		0.121827					10.376			0.0802
	10.9863		0.126904					10.376			0.0822
	10.9863		0.13198					10.376			0.0841
	10.9863		0.137056					10.376			0.0861
	10.9863		0.142132					10.376			0.0881
	10.9863		0.147208					10.376			0.09
	10.9863		0.152284					10.376			0.092
	10.9863		0.15736					10.9863			0.0939
	10.9863		0.162437					10.9863			0.0959
	10.9863		0.167513					10.9863			0.0978
	10.9863		0.172589					10.9863			0.099804
	10.9863		0.177665					10.9863			0.101761
	10.9863		0.182741					10.9863			0.103718
	10.9863		0.187817					10.9863			0.105675
	10.9863		0.192893					10.9863			0.107632
	10.9863		0.19797					10.9863			0.109589
	10.9863		0.203046					10.9863			0.111546
	10.9863		0.208122					10.9863			0.113503
	10.9863		0.213198					10.9863			0.11546
	10.9863		0.218274					10.9863			0.117417
	10.9863		0.22335					10.9863			0.119374
	10.9863		0.228426					10.9863			0.121331
	10.9863		0.233503					10.9863			0.123288
	10.9863		0.238579					10.9863			0.125245
	10.9863		0.243655					10.9863			0.127202
	10.9863		0.248731					10.9863			0.129159
	10.9863		0.253807					10.9863			0.131116
	10.9863		0.258883					10.9863			0.133072
	10.9863		0.263959					10.9863			0.135029
	10.9863		0.269036					10.9863			0.136986
	11.5967		0.274112					10.9863			0.138943
	11.5967		0.279188					10.9863			0.1409
	11.5967		0.284264					10.9863			0.142857
	11.5967		0.28934					10.9863			0.144814
	11.5967		0.294416					10.9863			0.146771
	11.5967		0.299492					10.9863			0.148728
	11.5967		0.304569					10.9863			0.150685
	11.5967		0.309645					10.9863			0.152642
	11.5967		0.314721					10.9863			0.154599
	11.5967		0.319797					10.9863			0.156556
	11.5967		0.324873					10.9863			0.158513
	11.5967		0.329949					10.9863			0.16047
	11.5967		0.335025					10.9863			0.162427
	11.5967		0.340102					10.9863			0.164384
	11.5967		0.345178					10.9863			0.166341
	11.5967		0.350254					10.9863			0.168298
	11.5967		0.35533					10.9863			0.170254
	11.5967		0.360406					10.9863			0.172211
	11.5967		0.365482					10.9863			0.174168
	11.5967		0.370558					10.9863			0.176125
	11.5967		0.375635					10.9863			0.178082
	11.5967		0.380711					10.9863			0.180039
	11.5967		0.385787					10.9863			0.181996
	12.207		0.390863					11.5967			0.183953
	12.207		0.395939					11.5967			0.18591
	12.207		0.401015					11.5967			0.187867
	12.207		0.406091					11.5967			0.189824
	12.207		0.411168					11.5967			0.191781
	12.207		0.416244					11.5967			0.193738
	12.207		0.42132					11.5967			0.195695
	12.207		0.426396					11.5967			0.197652
	12.207		0.431472					11.5967			0.199609
	12.207		0.436548					11.5967			0.201566
	12.207		0.441624					11.5967			0.203523
	12.207		0.446701					11.5967			0.20548
	12.207		0.451777					11.5967			0.207436
	12.207		0.456853					11.5967			0.209393
	12.207		0.461929					11.5967			0.21135
	12.207		0.467005					11.5967			0.213307
	12.207		0.472081					11.5967			0.215264
	12.207		0.477157					11.5967			0.217221
	12.207		0.482234					11.5967			0.219178
	12.8174		0.48731					11.5967			0.221135
	12.8174		0.492386					11.5967			0.223092
	12.8174		0.497462					11.5967			0.225049
	12.8174		0.502538					11.5967			0.227006
	12.8174		0.507614					11.5967			0.228963
	12.8174		0.51269					11.5967			0.23092
	12.8174		0.517767					11.5967			0.232877
	12.8174		0.522843					11.5967			0.234834
	12.8174		0.527919					11.5967			0.236791
	12.8174		0.532995					11.5967			0.238748
	12.8174		0.538071					11.5967			0.240705
	12.8174		0.543147					11.5967			0.242661
	12.8174		0.548223					11.5967			0.244618
	12.8174		0.5533					11.5967			0.246575
	12.8174		0.558376					11.5967			0.248532
	12.8174		0.563452					11.5967			0.250489
	12.8174		0.568528					11.5967			0.252446
	13.4277		0.573604					11.5967			0.254403
	13.4277		0.57868					11.5967			0.25636
	13.4277		0.583756					11.5967			0.258317
	13.4277		0.588833					11.5967			0.260274
	13.4277		0.593909					11.5967			0.262231
	13.4277		0.598985					11.5967			0.264188
	13.4277		0.604061					11.5967			0.266145
	13.4277		0.609137					11.5967			0.268102
	13.4277		0.614213					12.207			0.270059
	13.4277		0.619289					12.207			0.272016
	13.4277		0.624366					12.207			0.273973
	13.4277		0.629442					12.207			0.27593
	14.0381		0.634518					12.207			0.277887
	14.0381		0.639594					12.207			0.279843
	14.0381		0.64467					12.207			0.2818
	14.0381		0.649746					12.207			0.283757
	14.0381		0.654822					12.207			0.285714
	14.0381		0.659899					12.207			0.287671
	14.0381		0.664975					12.207			0.289628
	14.0381		0.670051					12.207			0.291585
	14.0381		0.675127					12.207			0.293542
	14.0381		0.680203					12.207			0.295499
	14.0381		0.685279					12.207			0.297456
	14.6484		0.690355					12.207			0.299413
	14.6484		0.695432					12.207			0.30137
	14.6484		0.700508					12.207			0.303327
	14.6484		0.705584					12.207			0.305284
	14.6484		0.71066					12.207			0.307241
	14.6484		0.715736					12.207			0.309198
	14.6484		0.720812					12.207			0.311155
	14.6484		0.725888					12.207			0.313112
	14.6484		0.730965					12.207			0.315069
	15.2588		0.736041					12.207			0.317026
	15.2588		0.741117					12.207			0.318982
	15.2588		0.746193					12.207			0.320939
	15.2588		0.751269					12.207			0.322896
	15.2588		0.756345					12.8174			0.324853
	15.2588		0.761421					12.8174			0.32681
	15.2588		0.766497					12.8174			0.328767
	15.2588		0.771574					12.8174			0.330724
	15.2588		0.77665					12.8174			0.332681
	15.2588		0.781726					12.8174			0.334638
	15.2588		0.786802					12.8174			0.336595
	15.8691		0.791878					12.8174			0.338552
	15.8691		0.796954					12.8174			0.340509
	15.8691		0.80203					12.8174			0.342466
	15.8691		0.807107					12.8174			0.344423
	15.8691		0.812183					12.8174			0.34638
	15.8691		0.817259					12.8174			0.348337
	15.8691		0.822335					12.8174			0.350294
	15.8691		0.827411					12.8174			0.352251
	15.8691		0.832487					12.8174			0.354207
	15.8691		0.837564					12.8174			0.356164
	16.4795		0.84264					12.8174			0.358121
	16.4795		0.847716					12.8174			0.360078
	16.4795		0.852792					12.8174			0.362035
	16.4795		0.857868					12.8174			0.363992
	16.4795		0.862944					12.8174			0.365949
	16.4795		0.86802					12.8174			0.367906
	17.0898		0.873097					13.4277			0.369863
	17.0898		0.878173					13.4277			0.37182
	17.0898		0.883249					13.4277			0.373777
	17.7002		0.888325					13.4277			0.375734
	17.7002		0.893401					13.4277			0.377691
	17.7002		0.898477					13.4277			0.379648
	17.7002		0.903553					13.4277			0.381605
	18.3105		0.908629					13.4277			0.383562
	18.3105		0.913706					13.4277			0.385519
	19.5312		0.918782					13.4277			0.387476
	19.5312		0.923858					13.4277			0.389433
	19.5312		0.928934					13.4277			0.391389
	19.5312		0.93401					13.4277			0.393346
	20.1416		0.939086					13.4277			0.395303
	20.1416		0.944162					13.4277			0.39726
	20.1416		0.949239					13.4277			0.399217
	21.3623		0.954315					13.4277			0.401174
	21.3623		0.959391					13.4277			0.403131
	21.9727		0.964467					13.4277			0.405088
	23.1934		0.969543					13.4277			0.407045
	24.4141		0.974619					13.4277			0.409002
	25.6348		0.979695					13.4277			0.410959
	27.4658		0.984772					13.4277			0.412916
	27.4658		0.989848					13.4277			0.414873
	28.0762		0.994924					13.4277			0.41683
	28.0762		1					13.4277			0.418787
	10.376			0.00159				13.4277			0.420744
	10.376			0.00318				13.4277			0.422701
	10.376			0.00478				13.4277			0.424658
	10.376			0.00637				13.4277			0.426615
	10.376			0.00796				13.4277			0.428571
	10.376			0.00955				14.0381			0.430528
	10.376			0.011147				14.0381			0.432485
	10.376			0.0127				14.0381			0.434442
	10.376			0.0143				14.0381			0.436399
	10.376			0.0159				14.0381			0.438356
	10.376			0.0175				14.0381			0.440313
	10.376			0.0191				14.0381			0.44227
	10.376			0.0207				14.0381			0.444227
	10.376			0.0223				14.0381			0.446184
	10.376			0.0239				14.0381			0.448141
	10.376			0.0255				14.0381			0.450098
	10.376			0.0271				14.0381			0.452055
	10.376			0.0287				14.0381			0.454012
	10.376			0.0303				14.0381			0.455969
	10.376			0.0318				14.0381			0.457926
	10.376			0.0334				14.0381			0.459883
	10.376			0.035				14.0381			0.46184
	10.376			0.036624				14.0381			0.463797
	10.376			0.0382				14.0381			0.465753
	10.376			0.0398				14.0381			0.46771
	10.376			0.0414				14.0381			0.469667
	10.376			0.043				14.0381			0.471624
	10.376			0.0446				14.0381			0.473581
	10.376			0.0462				14.0381			0.475538
	10.376			0.047771				14.0381			0.477495
	10.376			0.0494				14.0381			0.479452
	10.376			0.051				14.0381			0.481409
	10.376			0.0525				14.0381			0.483366
	10.376			0.0541				14.0381			0.485323
	10.376			0.0557				14.6484			0.48728
	10.376			0.0573				14.6484			0.489237
	10.376			0.058917				14.6484			0.491194
	10.376			0.0605				14.6484			0.493151
	10.376			0.0621				14.6484			0.495108
	10.376			0.0637				14.6484			0.497065
	10.376			0.0653				14.6484			0.499022
	10.376			0.0669				14.6484			0.500979
	10.376			0.0685				14.6484			0.502935
	10.376			0.070064				14.6484			0.504892
	10.376			0.0717				14.6484			0.506849
	10.376			0.0732				14.6484			0.508806
	10.376			0.0748				14.6484			0.510763
	10.376			0.0764				14.6484			0.51272
	10.376			0.078				14.6484			0.514677
	10.376			0.0796				14.6484			0.516634
	10.376			0.0812				14.6484			0.518591
	10.376			0.0828				14.6484			0.520548
	10.376			0.084395				14.6484			0.522505
	10.376			0.086				14.6484			0.524462
	10.376			0.0876				14.6484			0.526419
	10.9863			0.0892				14.6484			0.528376
	10.9863			0.0908				14.6484			0.530333
	10.9863			0.0924				14.6484			0.53229
	10.9863			0.0939				14.6484			0.534247
	10.9863			0.095541				14.6484			0.536204
	10.9863			0.0971				14.6484			0.53816
	10.9863			0.0987				14.6484			0.540117
	10.9863			0.100319				14.6484			0.542074
	10.9863			0.101911				15.2588			0.544031
	10.9863			0.103503				15.2588			0.545988
	10.9863			0.105096				15.2588			0.547945
	10.9863			0.106688				15.2588			0.549902
	10.9863			0.10828				15.2588			0.551859
	10.9863			0.109873				15.2588			0.553816
	10.9863			0.111465				15.2588			0.555773
	10.9863			0.113057				15.2588			0.55773
	10.9863			0.11465				15.2588			0.559687
	10.9863			0.116242				15.2588			0.561644
	10.9863			0.117834				15.2588			0.563601
	10.9863			0.119427				15.2588			0.565558
	10.9863			0.121019				15.2588			0.567515
	10.9863			0.122612				15.2588			0.569472
	10.9863			0.124204				15.2588			0.571429
	10.9863			0.125796				15.2588			0.573386
	10.9863			0.127389				15.8691			0.575343
	10.9863			0.128981				15.8691			0.577299
	10.9863			0.130573				15.8691			0.579256
	10.9863			0.132166				15.8691			0.581213
	10.9863			0.133758				15.8691			0.58317
	10.9863			0.13535				15.8691			0.585127
	10.9863			0.136943				15.8691			0.587084
	10.9863			0.138535				15.8691			0.589041
	10.9863			0.140127				15.8691			0.590998
	10.9863			0.14172				15.8691			0.592955
	10.9863			0.143312				15.8691			0.594912
	10.9863			0.144905				15.8691			0.596869
	10.9863			0.146497				15.8691			0.598826
	10.9863			0.148089				16.4795			0.600783
	10.9863			0.149682				16.4795			0.60274
	10.9863			0.151274				16.4795			0.604697
	10.9863			0.152866				16.4795			0.606654
	10.9863			0.154459				16.4795			0.608611
	10.9863			0.156051				16.4795			0.610568
	10.9863			0.157643				16.4795			0.612524
	10.9863			0.159236				16.4795			0.614481
	10.9863			0.160828				16.4795			0.616438
	10.9863			0.16242				16.4795			0.618395
	11.5967			0.164013				16.4795			0.620352
	11.5967			0.165605				16.4795			0.622309
	11.5967			0.167198				16.4795			0.624266
	11.5967			0.16879				16.4795			0.626223
	11.5967			0.170382				16.4795			0.62818
	11.5967			0.171975				16.4795			0.630137
	11.5967			0.173567				17.0898			0.632094
	11.5967			0.175159				17.0898			0.634051
	11.5967			0.176752				17.0898			0.636008
	11.5967			0.178344				17.0898			0.637965
	11.5967			0.179936				17.0898			0.639922
	11.5967			0.181529				17.0898			0.641879
	11.5967			0.183121				17.0898			0.643836
	11.5967			0.184713				17.0898			0.645793
	11.5967			0.186306				17.0898			0.64775
	11.5967			0.187898				17.0898			0.649707
	11.5967			0.189491				17.0898			0.651663
	11.5967			0.191083				17.0898			0.65362
	11.5967			0.192675				17.0898			0.655577
	11.5967			0.194268				17.0898			0.657534
	11.5967			0.19586				17.7002			0.659491
	11.5967			0.197452				17.7002			0.661448
	11.5967			0.199045				17.7002			0.663405
	11.5967			0.200637				17.7002			0.665362
	11.5967			0.202229				17.7002			0.667319
	11.5967			0.203822				17.7002			0.669276
	11.5967			0.205414				17.7002			0.671233
	11.5967			0.207006				17.7002			0.67319
	11.5967			0.208599				17.7002			0.675147
	11.5967			0.210191				17.7002			0.677104
	11.5967			0.211783				17.7002			0.679061
	11.5967			0.213376				17.7002			0.681018
	11.5967			0.214968				17.7002			0.682975
	11.5967			0.216561				17.7002			0.684932
	11.5967			0.218153				17.7002			0.686889
	11.5967			0.219745				17.7002			0.688845
	11.5967			0.221338				17.7002			0.690802
	11.5967			0.22293				17.7002			0.692759
	11.5967			0.224522				17.7002			0.694716
	11.5967			0.226115				17.7002			0.696673
	11.5967			0.227707				18.3105			0.69863
	11.5967			0.229299				18.3105			0.700587
	12.207			0.230892				18.3105			0.702544
	12.207			0.232484				18.3105			0.704501
	12.207			0.234076				18.3105			0.706458
	12.207			0.235669				18.3105			0.708415
	12.207			0.237261				18.3105			0.710372
	12.207			0.238854				18.3105			0.712329
	12.207			0.240446				18.3105			0.714286
	12.207			0.242038				18.3105			0.716243
	12.207			0.243631				18.3105			0.7182
	12.207			0.245223				18.3105			0.720157
	12.207			0.246815				18.3105			0.722114
	12.207			0.248408				18.3105			0.72407
	12.207			0.25				18.3105			0.726027
	12.207			0.251592				18.9209			0.727984
	12.207			0.253185				18.9209			0.729941
	12.207			0.254777				18.9209			0.731898
	12.207			0.256369				18.9209			0.733855
	12.207			0.257962				18.9209			0.735812
	12.207			0.259554				18.9209			0.737769
	12.207			0.261147				18.9209			0.739726
	12.207			0.262739				18.9209			0.741683
	12.207			0.264331				19.5312			0.74364
	12.207			0.265924				19.5312			0.745597
	12.207			0.267516				19.5312			0.747554
	12.207			0.269108				19.5312			0.749511
	12.207			0.270701				19.5312			0.751468
	12.207			0.272293				19.5312			0.753425
	12.207			0.273885				19.5312			0.755382
	12.207			0.275478				19.5312			0.757339
	12.207			0.27707				19.5312			0.759296
	12.207			0.278662				20.1416			0.761253
	12.207			0.280255				20.1416			0.763209
	12.207			0.281847				20.1416			0.765166
	12.207			0.28344				20.1416			0.767123
	12.207			0.285032				20.1416			0.76908
	12.207			0.286624				20.1416			0.771037
	12.8174			0.288217				20.1416			0.772994
	12.8174			0.289809				20.1416			0.774951
	12.8174			0.291401				20.1416			0.776908
	12.8174			0.292994				20.1416			0.778865
	12.8174			0.294586				20.1416			0.780822
	12.8174			0.296178				20.752			0.782779
	12.8174			0.297771				20.752			0.784736
	12.8174			0.299363				20.752			0.786693
	12.8174			0.300955				20.752			0.78865
	12.8174			0.302548				20.752			0.790607
	12.8174			0.30414				21.3623			0.792564
	12.8174			0.305733				21.3623			0.794521
	12.8174			0.307325				21.3623			0.796478
	12.8174			0.308917				21.3623			0.798434
	12.8174			0.31051				21.3623			0.800391
	12.8174			0.312102				21.3623			0.802348
	12.8174			0.313694				21.3623			0.804305
	12.8174			0.315287				21.9727			0.806262
	12.8174			0.316879				21.9727			0.808219
	12.8174			0.318471				22.583			0.810176
	12.8174			0.320064				22.583			0.812133
	12.8174			0.321656				22.583			0.81409
	12.8174			0.323248				22.583			0.816047
	12.8174			0.324841				22.583			0.818004
	12.8174			0.326433				22.583			0.819961
	12.8174			0.328026				23.1934			0.821918
	12.8174			0.329618				23.1934			0.823875
	12.8174			0.33121				23.1934			0.825832
	12.8174			0.332803				23.1934			0.827789
	12.8174			0.334395				23.8037			0.829746
	12.8174			0.335987				23.8037			0.831703
	12.8174			0.33758				23.8037			0.83366
	13.4277			0.339172				23.8037			0.835616
	13.4277			0.340764				23.8037			0.837573
	13.4277			0.342357				23.8037			0.83953
	13.4277			0.343949				23.8037			0.841487
	13.4277			0.345541				23.8037			0.843444
	13.4277			0.347134				23.8037			0.845401
	13.4277			0.348726				23.8037			0.847358
	13.4277			0.350319				24.4141			0.849315
	13.4277			0.351911				24.4141			0.851272
	13.4277			0.353503				24.4141			0.853229
	13.4277			0.355096				24.4141			0.855186
	13.4277			0.356688				24.4141			0.857143
	13.4277			0.35828				24.4141			0.8591
	13.4277			0.359873				25.0244			0.861057
	13.4277			0.361465				25.0244			0.863014
	13.4277			0.363057				25.0244			0.864971
	13.4277			0.36465				25.0244			0.866928
	13.4277			0.366242				25.0244			0.868885
	13.4277			0.367834				25.0244			0.870842
	13.4277			0.369427				25.6348			0.872798
	13.4277			0.371019				26.2451			0.874755
	13.4277			0.372612				26.2451			0.876712
	13.4277			0.374204				26.2451			0.878669
	13.4277			0.375796				26.2451			0.880626
	13.4277			0.377389				26.2451			0.882583
	13.4277			0.378981				26.8555			0.88454
	13.4277			0.380573				26.8555			0.886497
	13.4277			0.382166				26.8555			0.888454
	13.4277			0.383758				26.8555			0.890411
	13.4277			0.38535				27.4658			0.892368
	13.4277			0.386943				28.0762			0.894325
	13.4277			0.388535				28.0762			0.896282
	13.4277			0.390127				28.6865			0.898239
	13.4277			0.39172				28.6865			0.900196
	13.4277			0.393312				28.6865			0.902153
	13.4277			0.394905				29.2969			0.90411
	14.0381			0.396497				29.9072			0.906067
	14.0381			0.398089				30.5176			0.908024
	14.0381			0.399682				30.5176			0.90998
	14.0381			0.401274				30.5176			0.911937
	14.0381			0.402866				30.5176			0.913894
	14.0381			0.404459				30.5176			0.915851
	14.0381			0.406051				31.1279			0.917808
	14.0381			0.407643				31.1279			0.919765
	14.0381			0.409236				31.7383			0.921722
	14.0381			0.410828				32.3486			0.923679
	14.0381			0.41242				32.3486			0.925636
	14.0381			0.414013				33.5693			0.927593
	14.0381			0.415605				34.1797			0.92955
	14.0381			0.417198				34.79			0.931507
	14.0381			0.41879				35.4004			0.933464
	14.0381			0.420382				36.0107			0.935421
	14.0381			0.421975				36.6211			0.937378
	14.0381			0.423567				37.8418			0.939335
	14.0381			0.425159				37.8418			0.941292
	14.0381			0.426752				39.0625			0.943249
	14.0381			0.428344				40.2832			0.945206
	14.0381			0.429936				41.5039			0.947162
	14.0381			0.431529				41.5039			0.949119
	14.0381			0.433121				43.9453			0.951076
	14.0381			0.434713				43.9453			0.953033
	14.0381			0.436306				44.5557			0.95499
	14.0381			0.437898				45.7764			0.956947
	14.6484			0.43949				45.7764			0.958904
	14.6484			0.441083				45.7764			0.960861
	14.6484			0.442675				52.4902			0.962818
	14.6484			0.444268				57.9834			0.964775
	14.6484			0.44586				58.5938			0.966732
	14.6484			0.447452				59.2041			0.968689
	14.6484			0.449045				70.1904			0.970646
	14.6484			0.450637				114.746			0.972603
	14.6484			0.452229				703.125			0.97456
	14.6484			0.453822				704.956			0.976517
	14.6484			0.455414				707.397			0.978474
	14.6484			0.457006				708.618			0.980431
	14.6484			0.458599				712.28			0.982388
	14.6484			0.460191				717.773			0.984344
	14.6484			0.461783				720.825			0.986301
	14.6484			0.463376				723.266			0.988258
	14.6484			0.464968				724.487			0.990215
	14.6484			0.466561				727.539			0.992172
	14.6484			0.468153				727.539			0.994129
	14.6484			0.469745				729.98			0.996086
	14.6484			0.471338				731.201			0.998043
	14.6484			0.47293				738.525			1
	15.2588			0.474522
	15.2588			0.476115
	15.2588			0.477707
	15.2588			0.479299
	15.2588			0.480892
	15.2588			0.482484
	15.2588			0.484076
	15.2588			0.485669
	15.2588			0.487261
	15.2588			0.488854
	15.2588			0.490446
	15.2588			0.492038
	15.2588			0.493631
	15.2588			0.495223
	15.2588			0.496815
	15.2588			0.498408
	15.2588			0.5
	15.2588			0.501592
	15.2588			0.503185
	15.2588			0.504777
	15.2588			0.506369
	15.8691			0.507962
	15.8691			0.509554
	15.8691			0.511147
	15.8691			0.512739
	15.8691			0.514331
	15.8691			0.515924
	15.8691			0.517516
	15.8691			0.519108
	15.8691			0.520701
	15.8691			0.522293
	15.8691			0.523885
	15.8691			0.525478
	15.8691			0.52707
	15.8691			0.528662
	15.8691			0.530255
	15.8691			0.531847
	15.8691			0.53344
	15.8691			0.535032
	15.8691			0.536624
	16.4795			0.538217
	16.4795			0.539809
	16.4795			0.541401
	16.4795			0.542994
	16.4795			0.544586
	16.4795			0.546178
	16.4795			0.547771
	16.4795			0.549363
	16.4795			0.550955
	16.4795			0.552548
	16.4795			0.55414
	16.4795			0.555733
	16.4795			0.557325
	16.4795			0.558917
	17.0898			0.56051
	17.0898			0.562102
	17.0898			0.563694
	17.0898			0.565287
	17.0898			0.566879
	17.0898			0.568471
	17.0898			0.570064
	17.0898			0.571656
	17.0898			0.573248
	17.0898			0.574841
	17.0898			0.576433
	17.7002			0.578026
	17.7002			0.579618
	17.7002			0.58121
	17.7002			0.582803
	17.7002			0.584395
	17.7002			0.585987
	17.7002			0.58758
	17.7002			0.589172
	17.7002			0.590764
	17.7002			0.592357
	17.7002			0.593949
	17.7002			0.595541
	18.3105			0.597134
	18.3105			0.598726
	18.3105			0.600319
	18.3105			0.601911
	18.3105			0.603503
	18.3105			0.605096
	18.3105			0.606688
	18.3105			0.60828
	18.3105			0.609873
	18.3105			0.611465
	18.3105			0.613057
	18.3105			0.61465
	18.3105			0.616242
	18.3105			0.617834
	18.3105			0.619427
	18.3105			0.621019
	18.3105			0.622612
	18.3105			0.624204
	18.3105			0.625796
	18.3105			0.627389
	18.9209			0.628981
	18.9209			0.630573
	18.9209			0.632166
	18.9209			0.633758
	18.9209			0.63535
	18.9209			0.636943
	18.9209			0.638535
	18.9209			0.640127
	18.9209			0.64172
	19.5312			0.643312
	19.5312			0.644904
	19.5312			0.646497
	19.5312			0.648089
	19.5312			0.649682
	19.5312			0.651274
	19.5312			0.652866
	19.5312			0.654459
	19.5312			0.656051
	19.5312			0.657643
	19.5312			0.659236
	19.5312			0.660828
	19.5312			0.66242
	19.5312			0.664013
	19.5312			0.665605
	19.5312			0.667198
	20.1416			0.66879
	20.1416			0.670382
	20.1416			0.671975
	20.1416			0.673567
	20.1416			0.675159
	20.1416			0.676752
	20.1416			0.678344
	20.1416			0.679936
	20.1416			0.681529
	20.1416			0.683121
	20.1416			0.684713
	20.1416			0.686306
	20.752			0.687898
	20.752			0.68949
	20.752			0.691083
	20.752			0.692675
	20.752			0.694268
	20.752			0.69586
	20.752			0.697452
	20.752			0.699045
	20.752			0.700637
	20.752			0.702229
	21.3623			0.703822
	21.3623			0.705414
	21.3623			0.707006
	21.3623			0.708599
	21.3623			0.710191
	21.3623			0.711784
	21.3623			0.713376
	21.3623			0.714968
	21.9727			0.716561
	21.9727			0.718153
	21.9727			0.719745
	21.9727			0.721338
	21.9727			0.72293
	21.9727			0.724522
	21.9727			0.726115
	21.9727			0.727707
	21.9727			0.729299
	21.9727			0.730892
	21.9727			0.732484
	21.9727			0.734076
	21.9727			0.735669
	21.9727			0.737261
	21.9727			0.738854
	22.583			0.740446
	22.583			0.742038
	22.583			0.743631
	22.583			0.745223
	22.583			0.746815
	22.583			0.748408
	22.583			0.75
	22.583			0.751592
	22.583			0.753185
	22.583			0.754777
	22.583			0.756369
	23.1934			0.757962
	23.1934			0.759554
	23.1934			0.761147
	23.1934			0.762739
	23.1934			0.764331
	23.1934			0.765924
	23.1934			0.767516
	23.1934			0.769108
	23.1934			0.770701
	23.1934			0.772293
	23.1934			0.773885
	23.1934			0.775478
	23.1934			0.77707
	23.1934			0.778662
	23.1934			0.780255
	23.1934			0.781847
	23.1934			0.78344
	23.1934			0.785032
	23.1934			0.786624
	23.1934			0.788217
	23.1934			0.789809
	23.8037			0.791401
	23.8037			0.792994
	23.8037			0.794586
	23.8037			0.796178
	23.8037			0.797771
	23.8037			0.799363
	23.8037			0.800955
	24.4141			0.802548
	25.0244			0.80414
	25.0244			0.805733
	25.0244			0.807325
	25.0244			0.808917
	25.0244			0.81051
	25.0244			0.812102
	25.0244			0.813694
	25.6348			0.815287
	25.6348			0.816879
	25.6348			0.818471
	25.6348			0.820064
	25.6348			0.821656
	25.6348			0.823248
	26.2451			0.824841
	26.2451			0.826433
	26.2451			0.828026
	26.2451			0.829618
	26.2451			0.83121
	26.2451			0.832803
	26.2451			0.834395
	26.8555			0.835987
	26.8555			0.83758
	26.8555			0.839172
	26.8555			0.840764
	26.8555			0.842357
	26.8555			0.843949
	27.4658			0.845541
	27.4658			0.847134
	27.4658			0.848726
	27.4658			0.850319
	27.4658			0.851911
	27.4658			0.853503
	27.4658			0.855096
	28.0762			0.856688
	28.0762			0.85828
	28.0762			0.859873
	28.0762			0.861465
	28.6865			0.863057
	28.6865			0.86465
	28.6865			0.866242
	28.6865			0.867834
	28.6865			0.869427
	29.2969			0.871019
	29.2969			0.872612
	29.2969			0.874204
	29.2969			0.875796
	29.2969			0.877389
	29.9072			0.878981
	29.9072			0.880573
	29.9072			0.882166
	29.9072			0.883758
	29.9072			0.88535
	29.9072			0.886943
	29.9072			0.888535
	29.9072			0.890127
	29.9072			0.89172
	30.5176			0.893312
	30.5176			0.894904
	30.5176			0.896497
	30.5176			0.898089
	30.5176			0.899682
	30.5176			0.901274
	30.5176			0.902866
	30.5176			0.904459
	30.5176			0.906051
	30.5176			0.907643
	30.5176			0.909236
	31.1279			0.910828
	31.1279			0.91242
	31.1279			0.914013
	31.1279			0.915605
	31.7383			0.917198
	31.7383			0.91879
	31.7383			0.920382
	31.7383			0.921975
	32.3486			0.923567
	32.3486			0.925159
	32.3486			0.926752
	32.3486			0.928344
	32.3486			0.929936
	32.3486			0.931529
	32.3486			0.933121
	32.3486			0.934713
	32.3486			0.936306
	32.959			0.937898
	32.959			0.93949
	32.959			0.941083
	32.959			0.942675
	32.959			0.944268
	34.1797			0.94586
	34.1797			0.947452
	34.1797			0.949045
	34.1797			0.950637
	34.79			0.952229
	34.79			0.953822
	34.79			0.955414
	34.79			0.957006
	35.4004			0.958599
	36.0107			0.960191
	36.0107			0.961784
	36.0107			0.963376
	36.6211			0.964968
	36.6211			0.966561
	36.6211			0.968153
	37.2315			0.969745
	37.2315			0.971338
	37.2315			0.97293
	39.0625			0.974522
	40.2832			0.976115
	40.2832			0.977707
	40.8935			0.979299
	40.8935			0.980892
	46.3867			0.982484
	47.6074			0.984076
	47.6074			0.985669
	50.0488			0.987261
	51.2695			0.988854
	52.4902			0.990446
	53.1006			0.992038
	55.542			0.993631
	57.9834			0.995223
	58.5938			0.996815
	61.0352			0.998408
	70.1904			1
